# Supplementary material for: Synthesis, biological evaluation, and in silico studies of novel chalcone- and pyrazoline-based 1,3,5-triazines as potential anticancer agents
Source: Royal Society of Chemistry journal article supplement (doi:10.1039/d0ra06799g), 2020-01-01
Supplement: d0ra06799g1.pdf [file d0ra06799g1.pdf]

## Synthesis, biological evaluation, and *in silico* studies of novel chalcone- and pyrazoline-based 1,3,5-triazine as potential anticancer agents

Leydi M. Moreno,<sup>a</sup> Jairo Quiroga,<sup>a,b</sup> Rodrigo Abonia,<sup>a,b</sup> Antonino Lauria,<sup>c</sup> Annamaria Martorana,<sup>c</sup> Henry Insuasty<sup>d</sup> and Braulio Insuasty<sup>\*a,b</sup>

<sup>a</sup>Heterocyclic Compounds Research Group, Department of Chemistry, Universidad del Valle, A.A. 25360 Cali, Colombia. E-mail: braulio.insuasty@correounivalle.edu.co. <sup>b</sup>Center for Bioinformatics and Photonics-CIBioFI, A.A. 25360 Cali, Colombia. <sup>d</sup>Dipartimento di Scienze e Tecnologie Biologiche Chimiche e Farmaceutiche "STEBICEF", Università di Palermo, Viale delle Scienze Ed. 17, I-90128 Palermo, Italy. <sup>e</sup>Heterocyclic Compounds Research Group, Department of Chemistry, Universidad de Nariño, A.A. 1175 Pasto, Colombia

### Electronic Supplementary Material (ESI)

NMR spectra of synthesized compounds.....S2-33

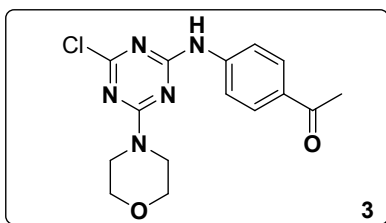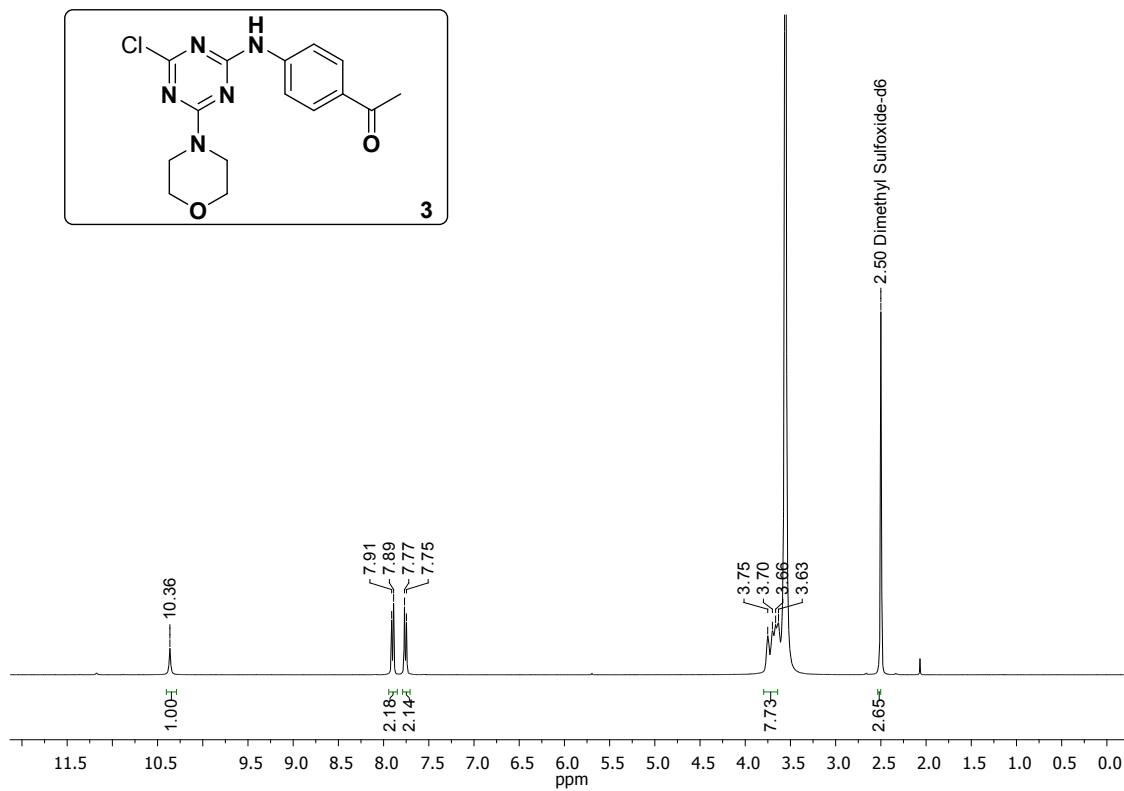

$^1\text{H}$  NMR (400 MHz,  $\text{DMSO-}d_6$ ) spectrum of **3**.

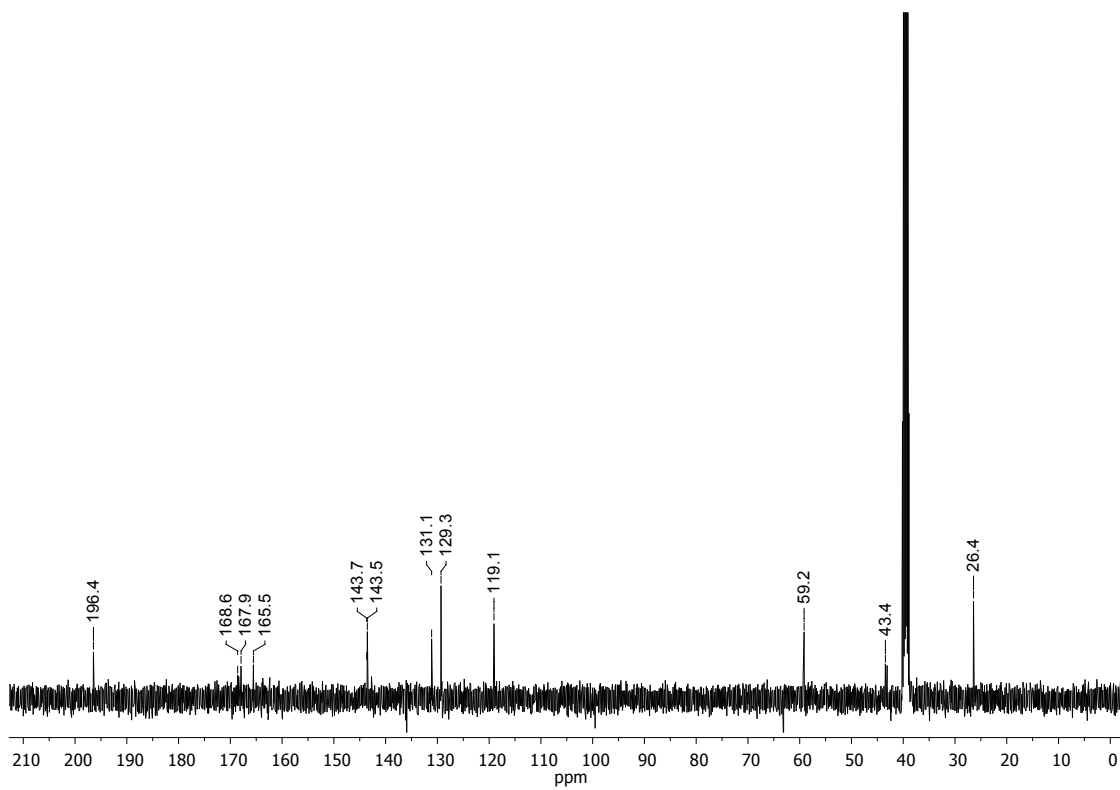

$^{13}\text{C}$  NMR (100 MHz,  $\text{DMSO-}d_6$ ) spectrum of **3**.

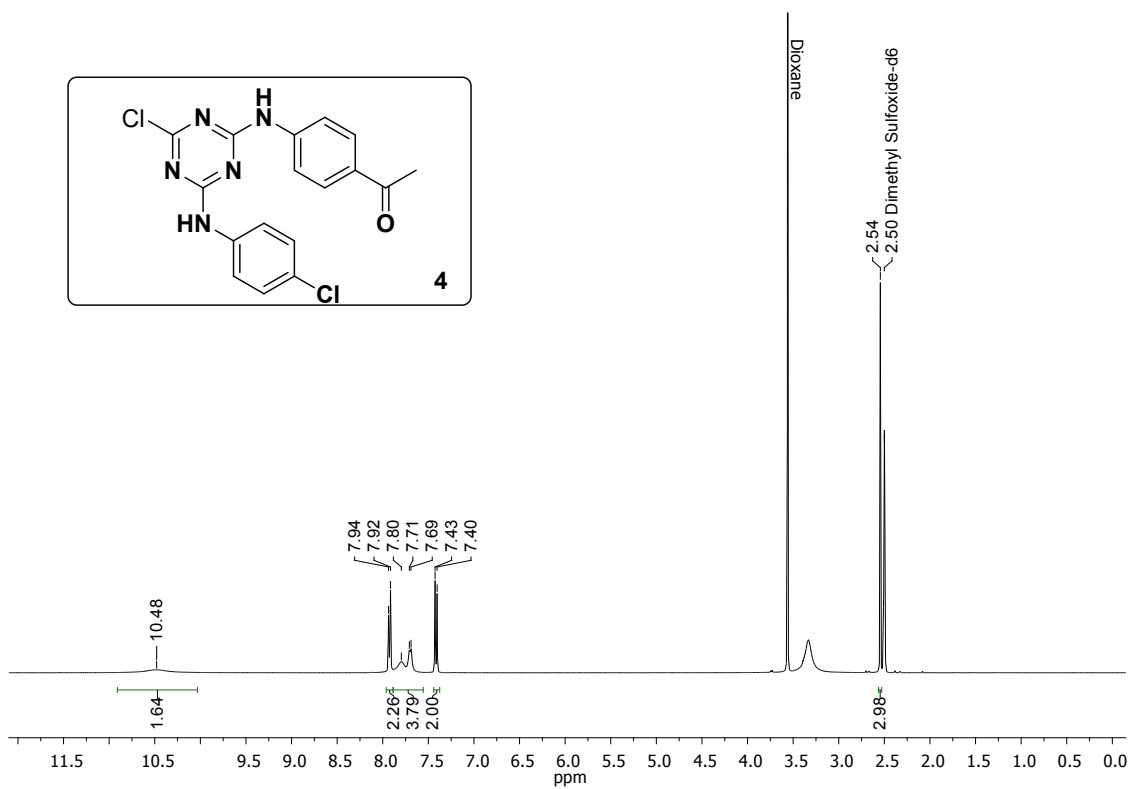

<sup>1</sup>H NMR (400 MHz, DMSO-*d*<sub>6</sub>) spectrum of **4**.

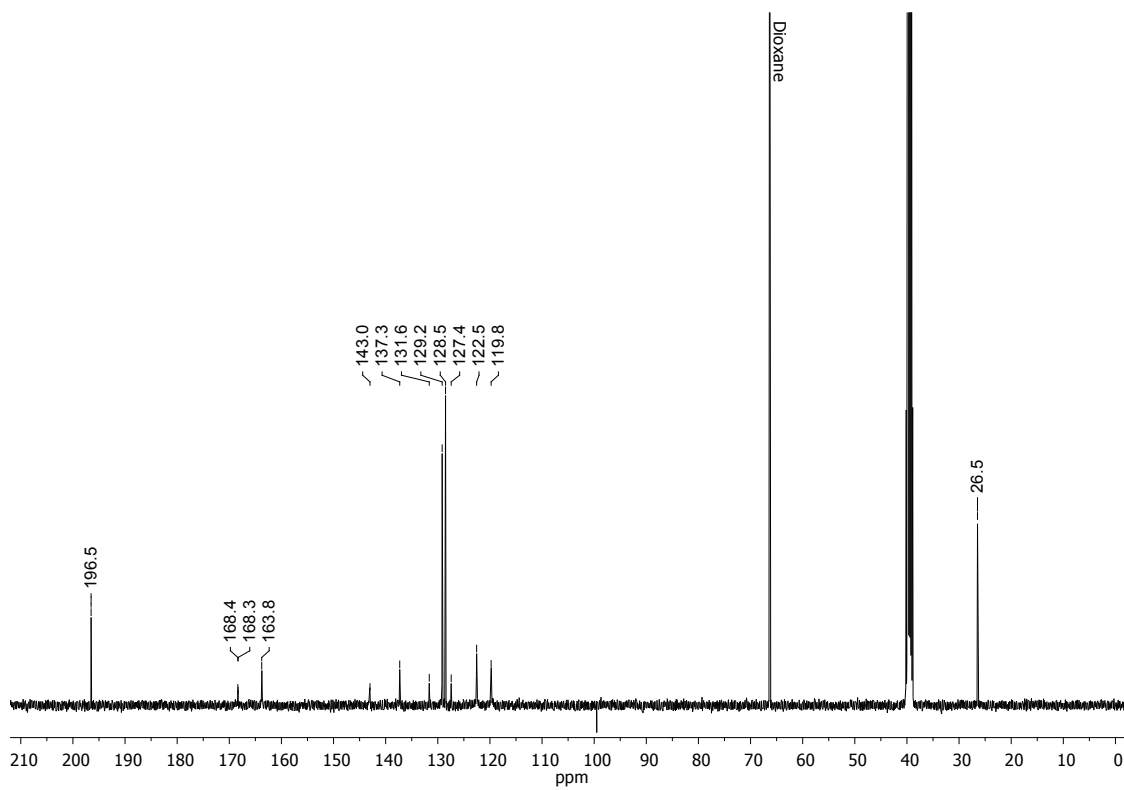

<sup>13</sup>C NMR (100 MHz, DMSO-*d*<sub>6</sub>) spectrum of **4**.

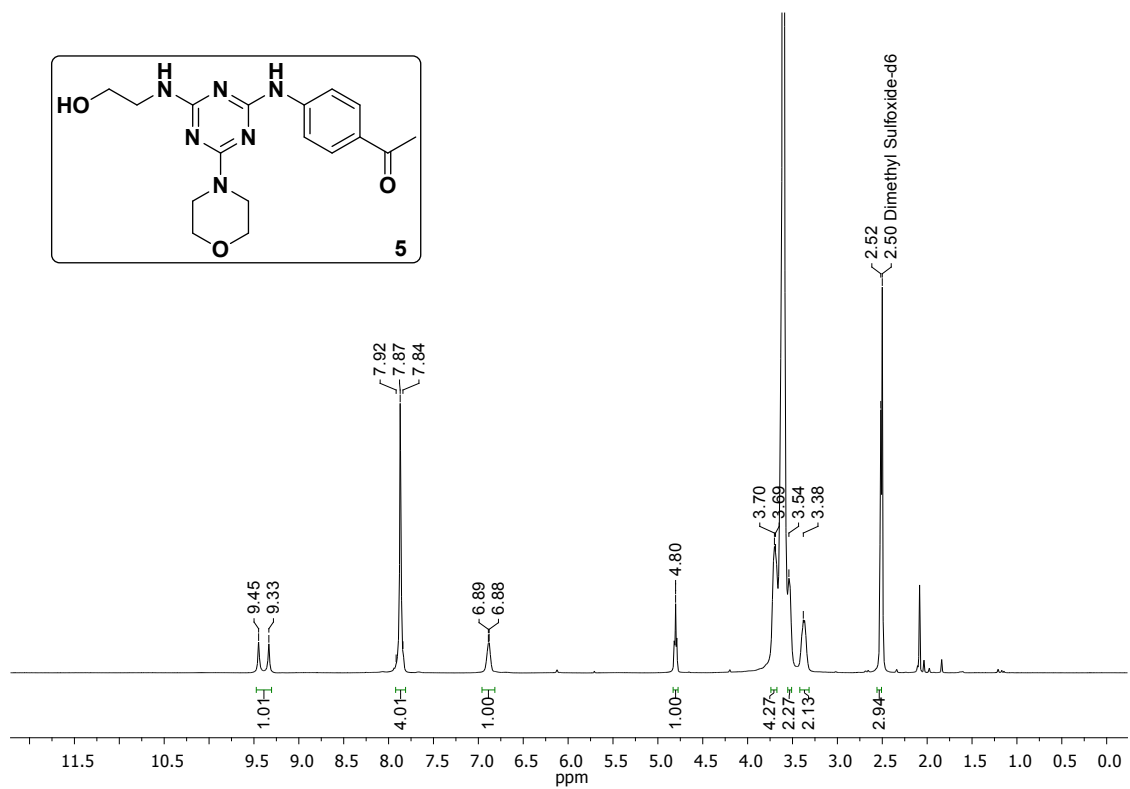

<sup>1</sup>H NMR (400 MHz, DMSO-*d*<sub>6</sub>) spectrum of **5**.

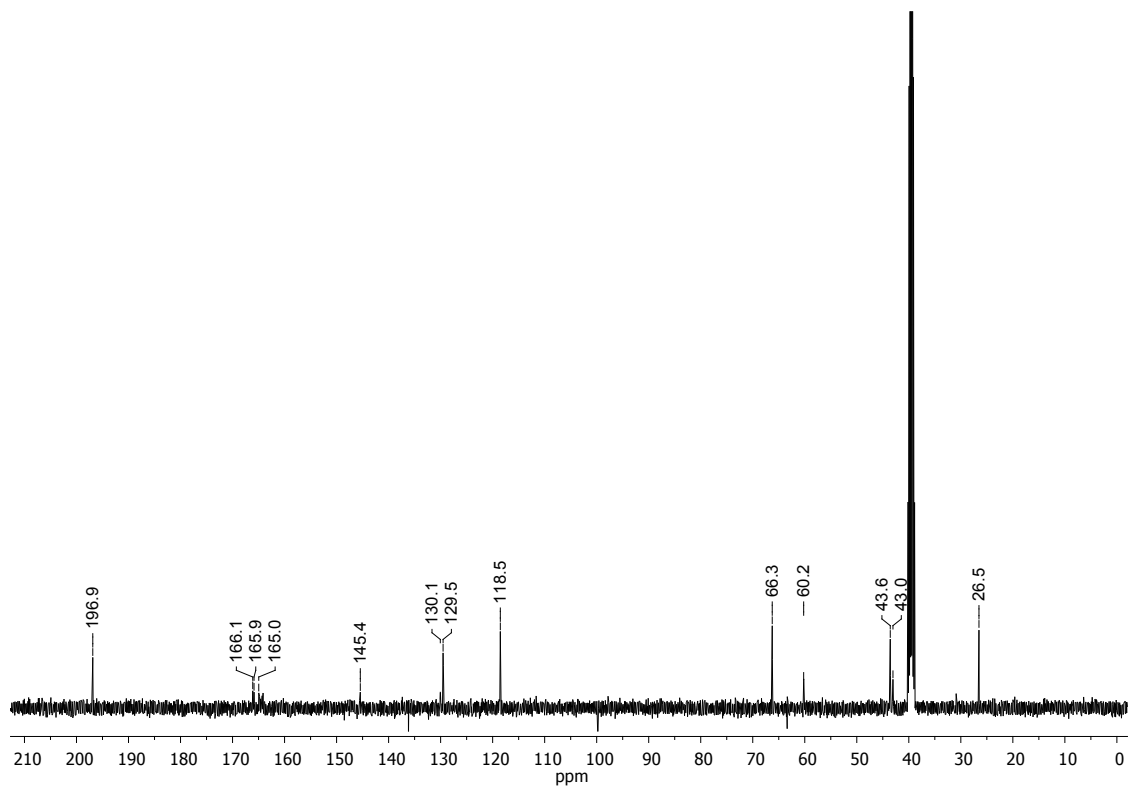

<sup>13</sup>C NMR (100 MHz, DMSO-*d*<sub>6</sub>) spectrum of **5**.

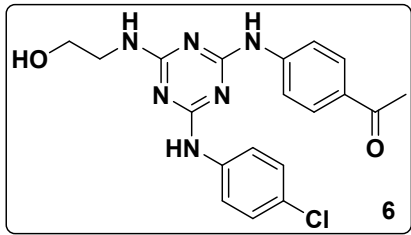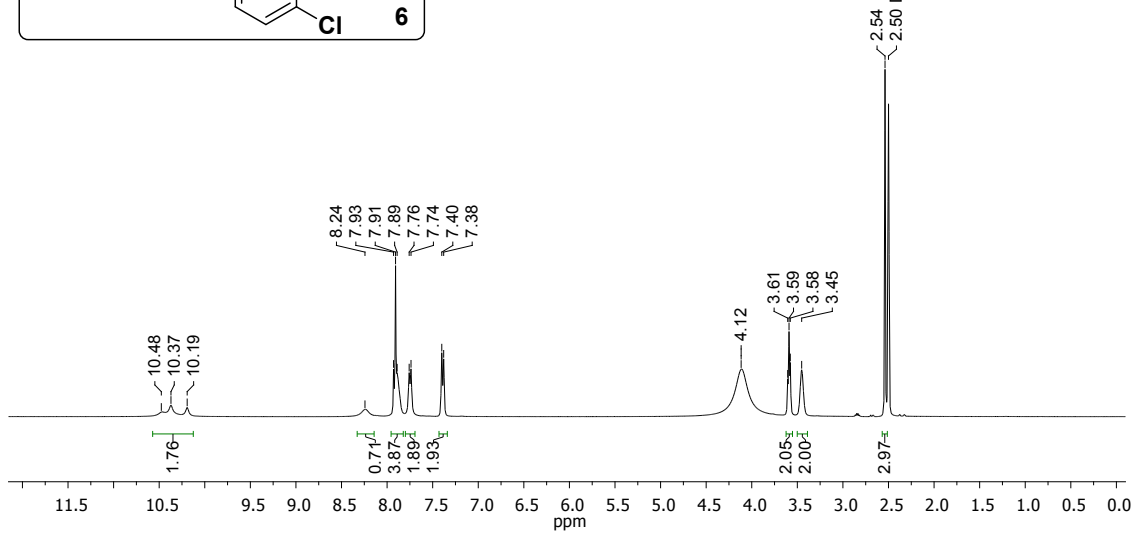

<sup>1</sup>H NMR (400 MHz, DMSO-*d*<sub>6</sub>) spectrum of **6**.

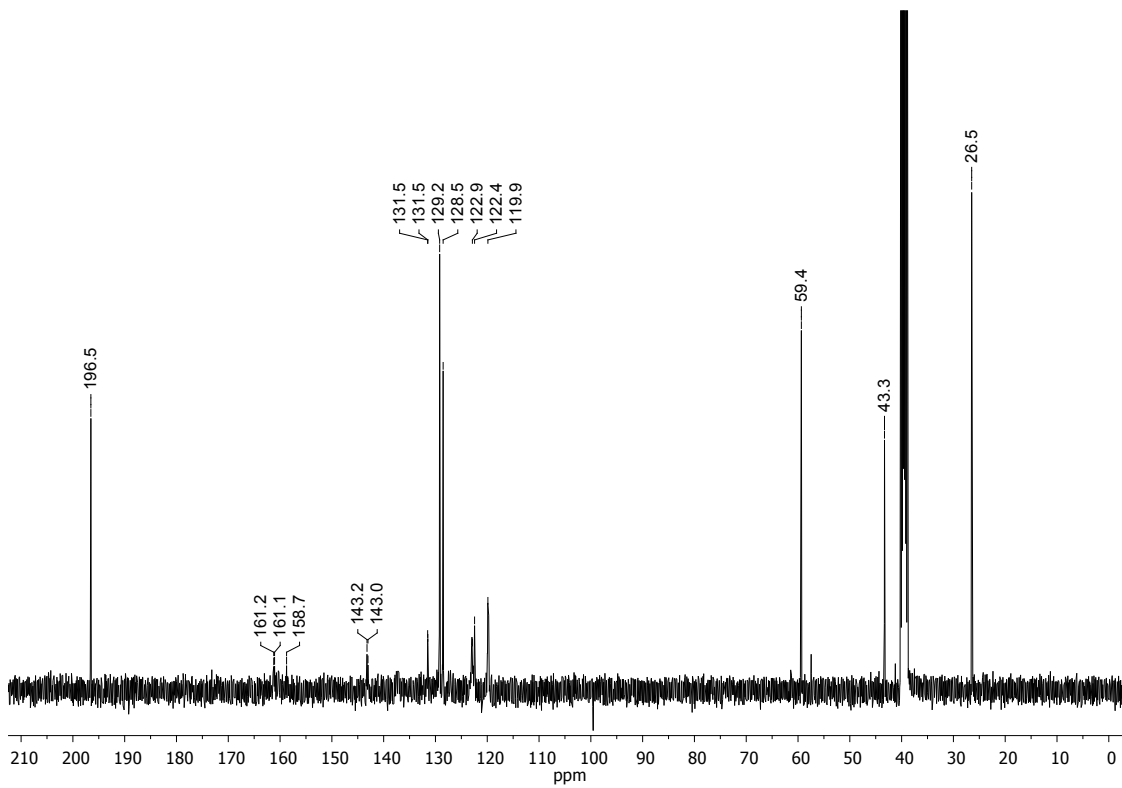

<sup>13</sup>C NMR (100 MHz, DMSO-*d*<sub>6</sub>) spectrum of **6**.

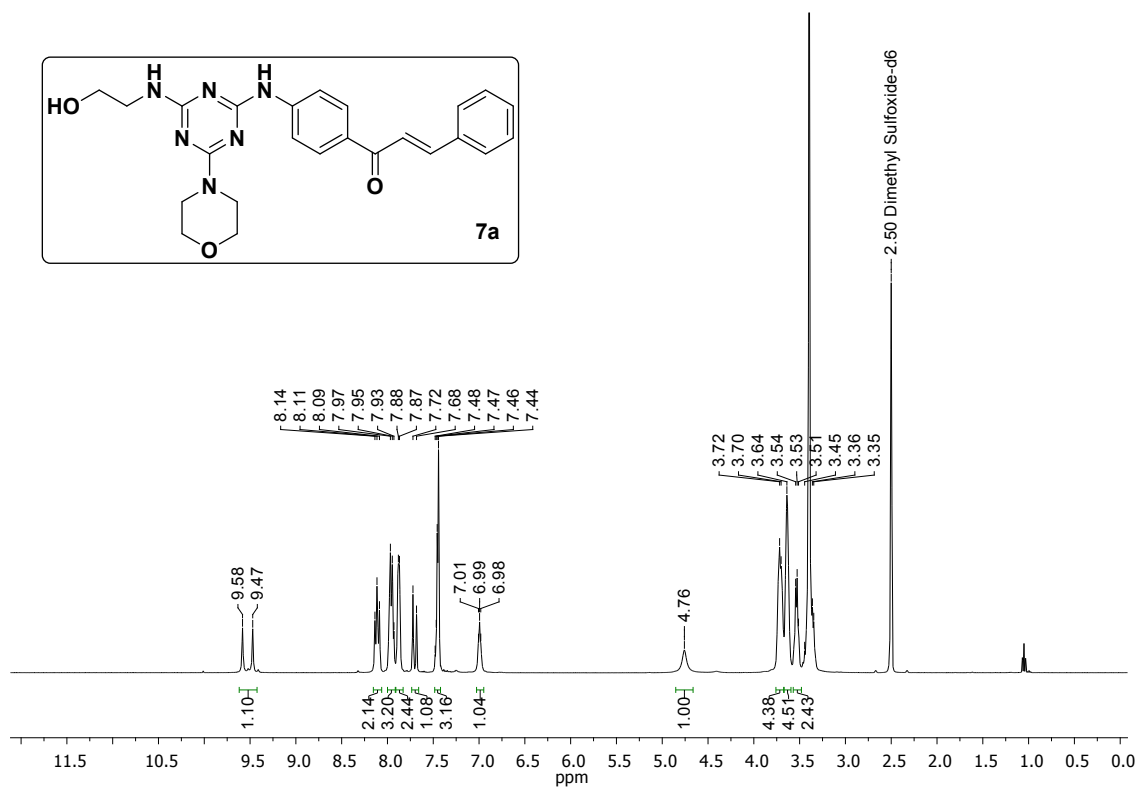

<sup>1</sup>H NMR (400 MHz, DMSO-*d*<sub>6</sub>) spectrum of **7a**.

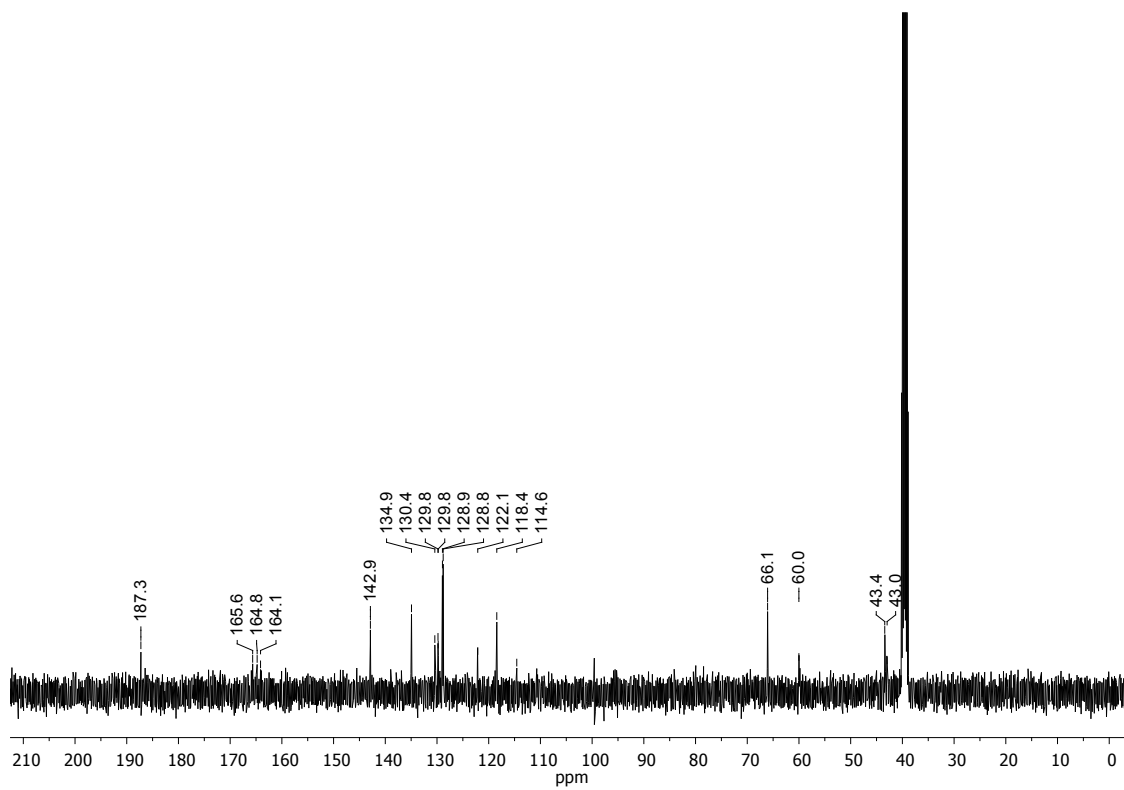

<sup>13</sup>C NMR (100 MHz, DMSO-*d*<sub>6</sub>) spectrum of **7a**.

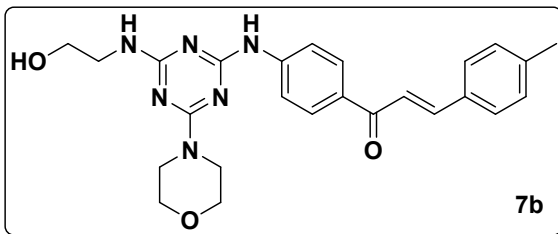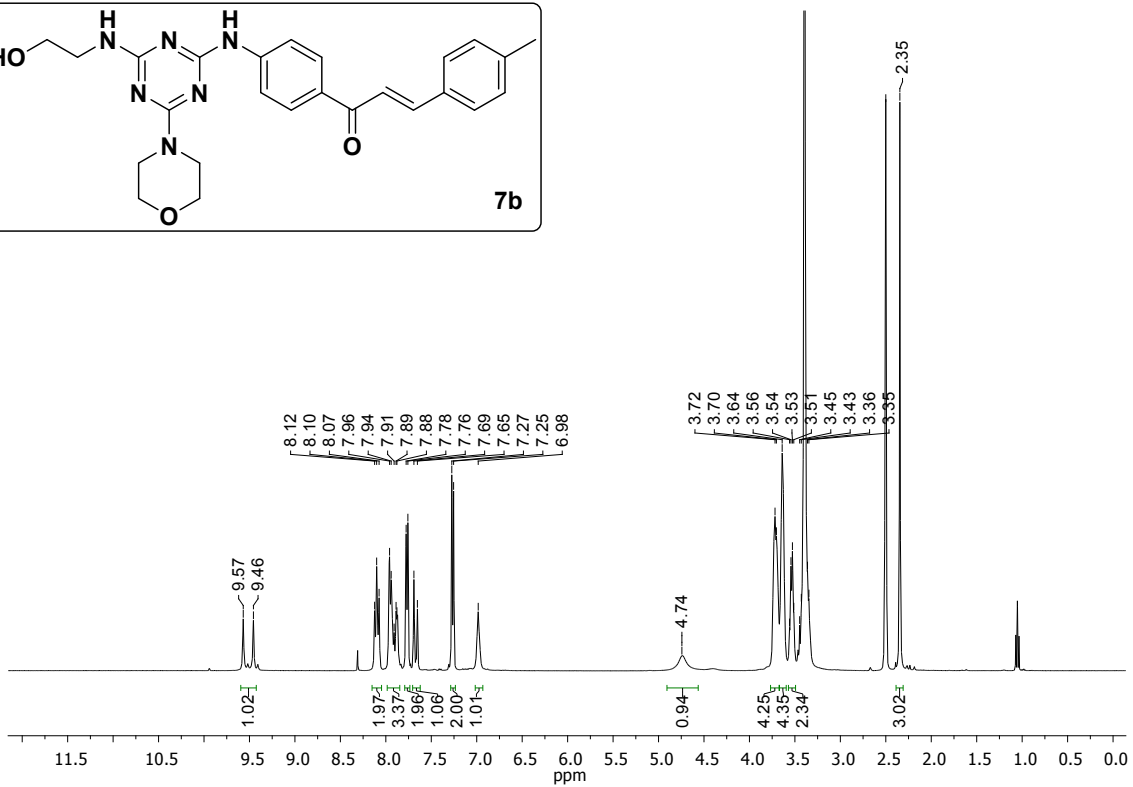

<sup>1</sup>H NMR (400 MHz, DMSO-*d*<sub>6</sub>) spectrum of **7b**.

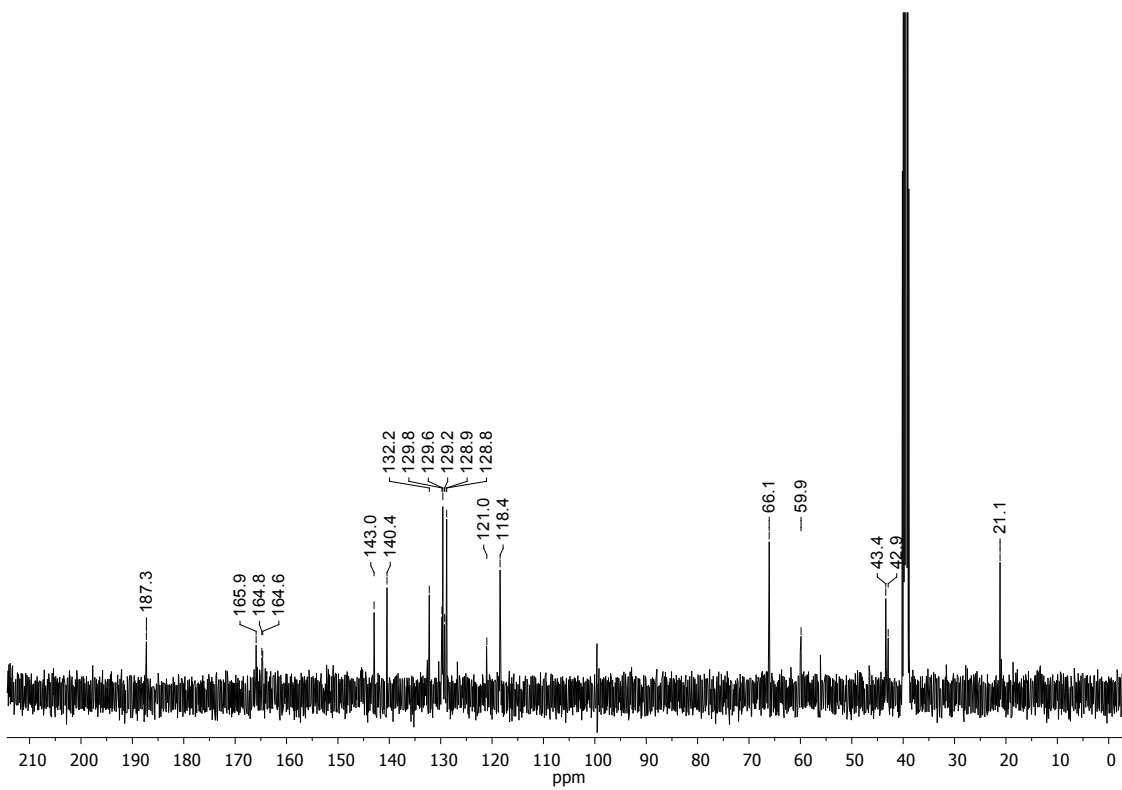

<sup>13</sup>C NMR (100 MHz, DMSO-*d*<sub>6</sub>) spectrum of **7b**.

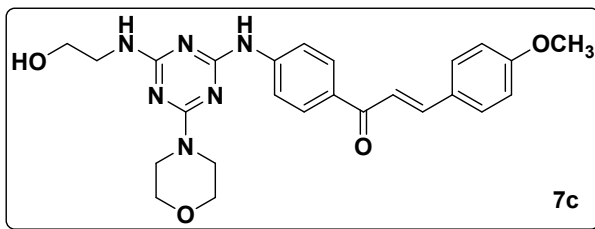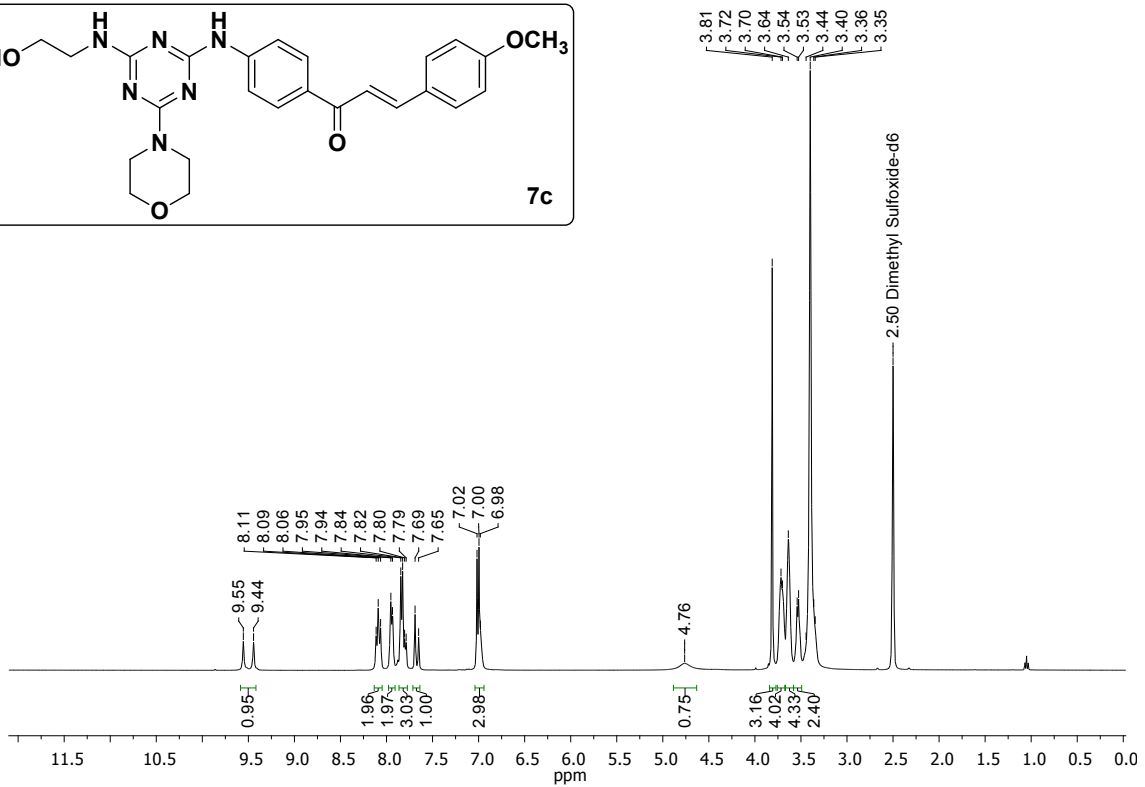

$^1\text{H}$  NMR (400 MHz,  $\text{DMSO-}d_6$ ) spectrum of **7c**.

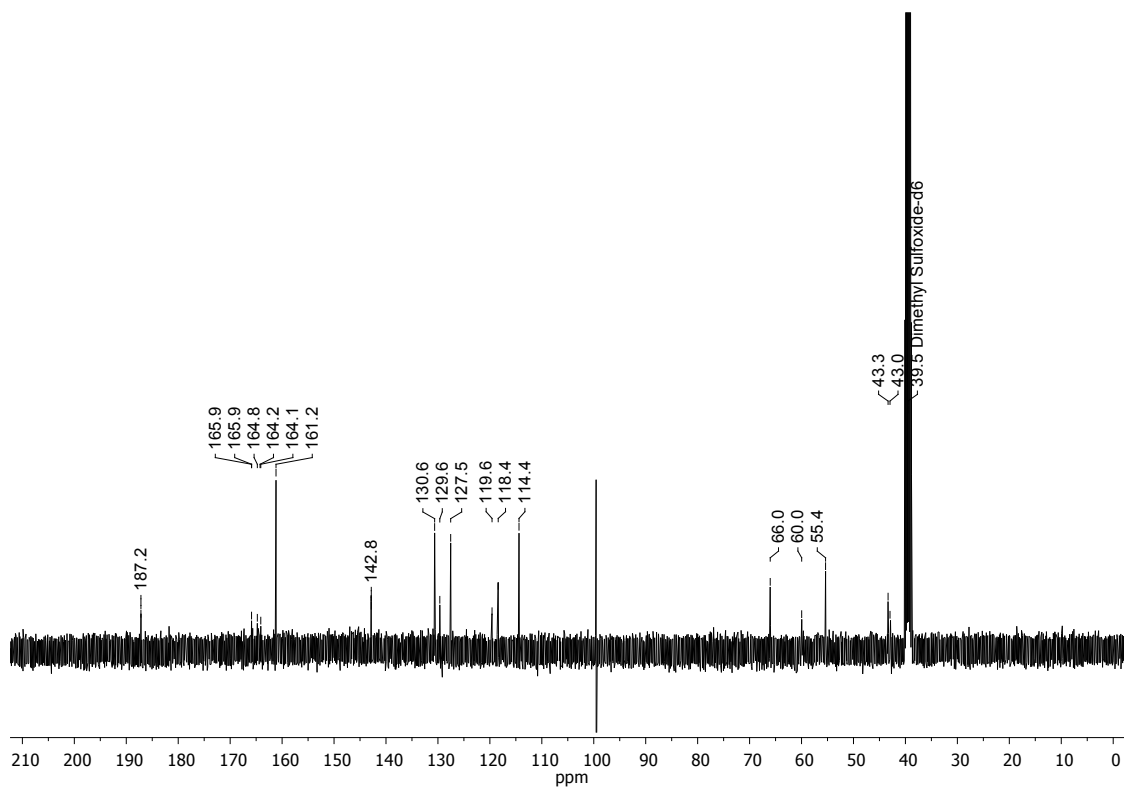

$^{13}\text{C}$  NMR (100 MHz,  $\text{DMSO-}d_6$ ) spectrum of **7c**.



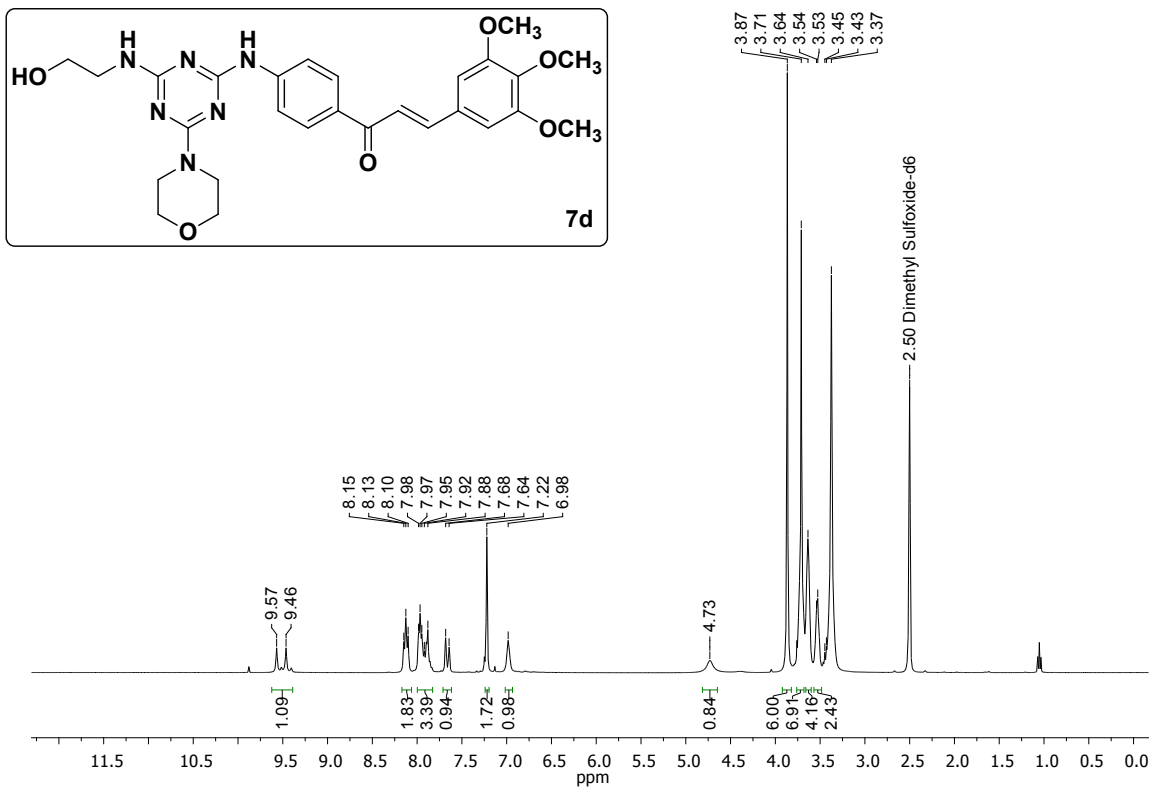

$^1\text{H NMR}$  (400 MHz,  $\text{DMSO-}d_6$ ) spectrum of **7d**.

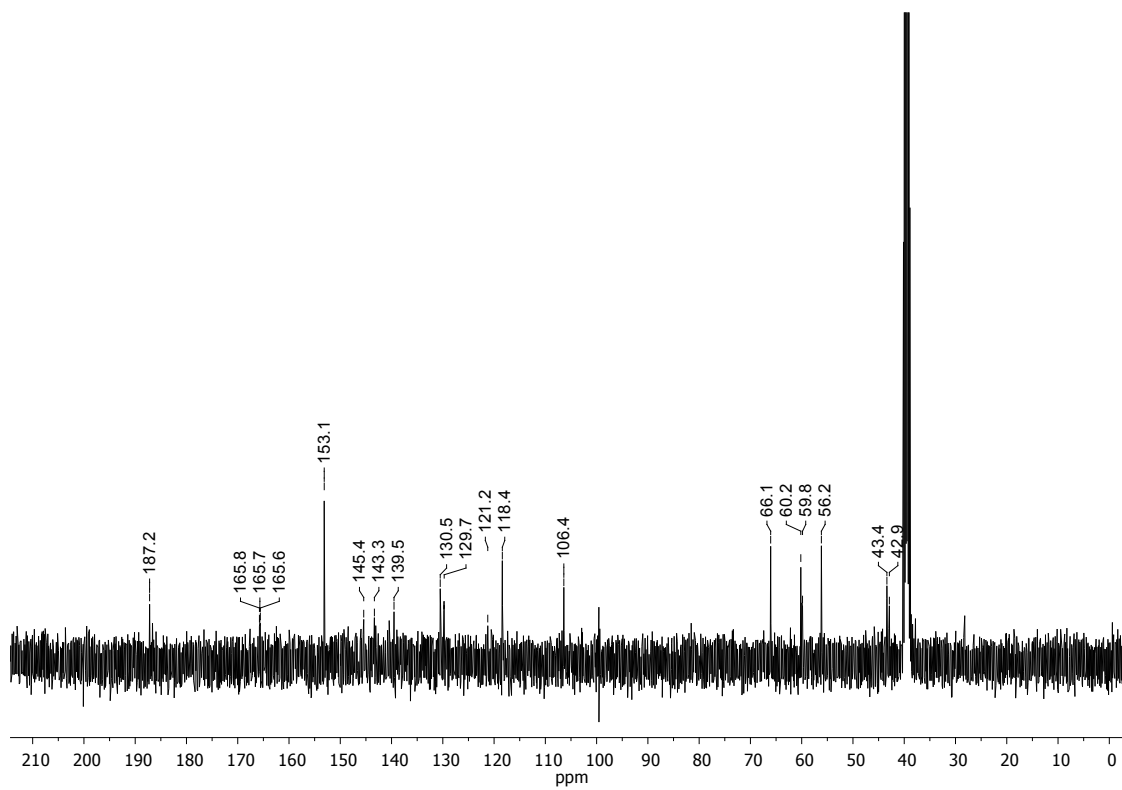

$^{13}\text{C NMR}$  (100 MHz,  $\text{DMSO-}d_6$ ) spectrum of **7d**.

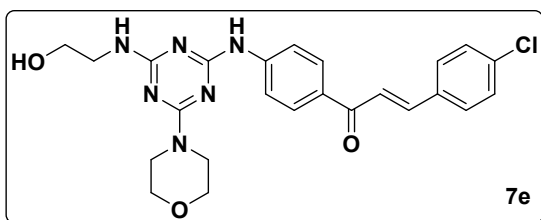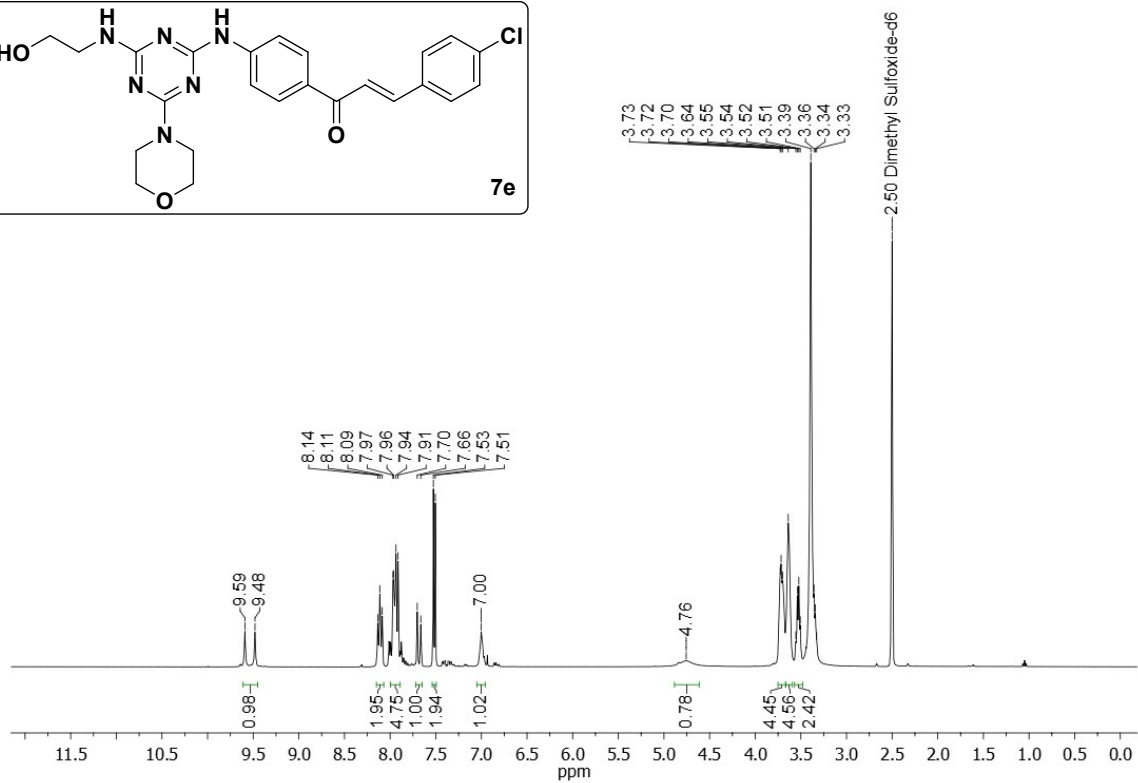

$^1\text{H}$  NMR (400 MHz,  $\text{DMSO-}d_6$ ) spectrum of **7e**.

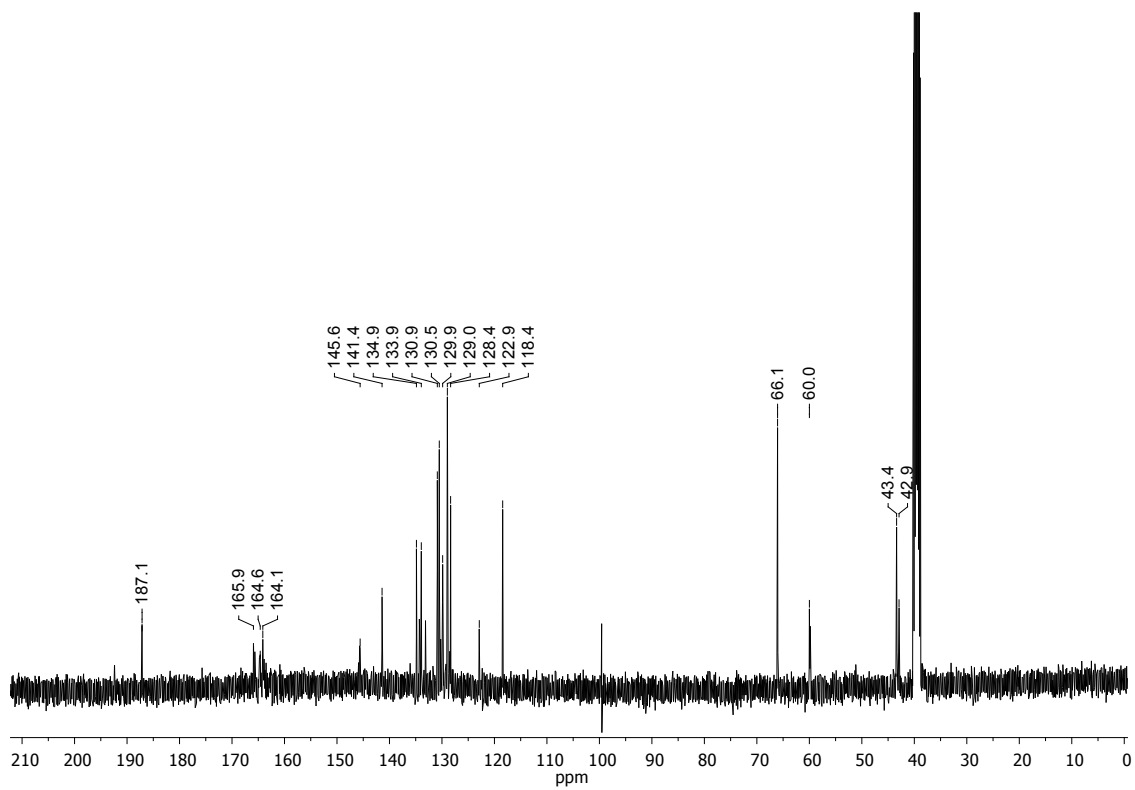

$^{13}\text{C}$  NMR (100 MHz,  $\text{DMSO-}d_6$ ) spectrum of **7e**.

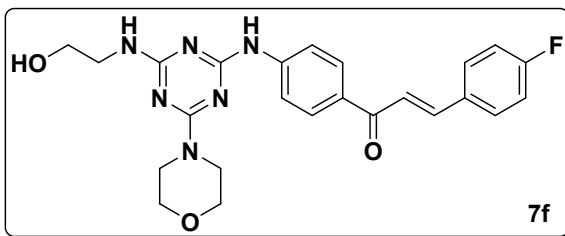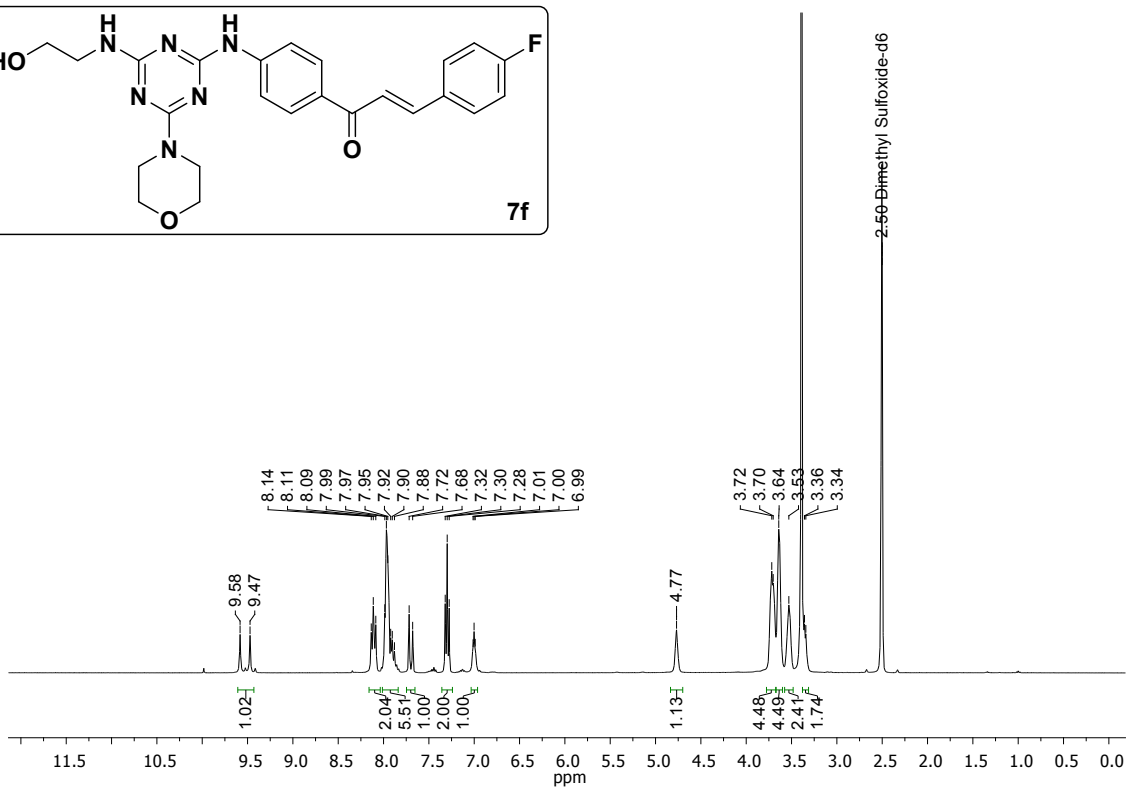

$^1\text{H}$  NMR (400 MHz,  $\text{DMSO-}d_6$ ) spectrum of **7f**.

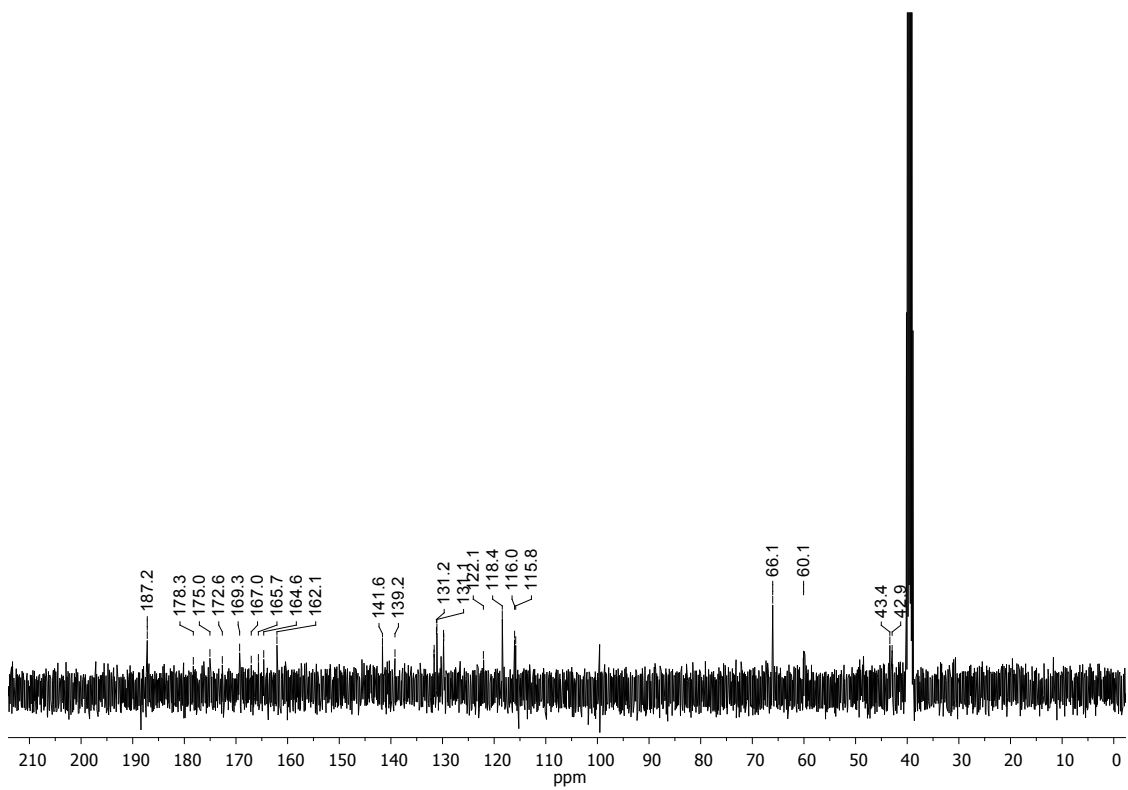

$^{13}\text{C}$  NMR (100 MHz,  $\text{DMSO-}d_6$ ) spectrum of **7f**.

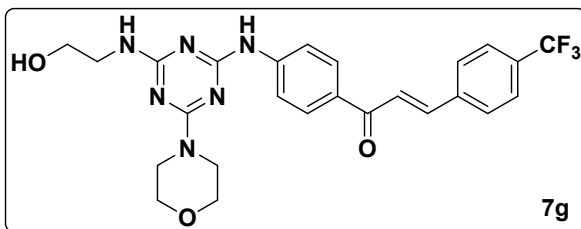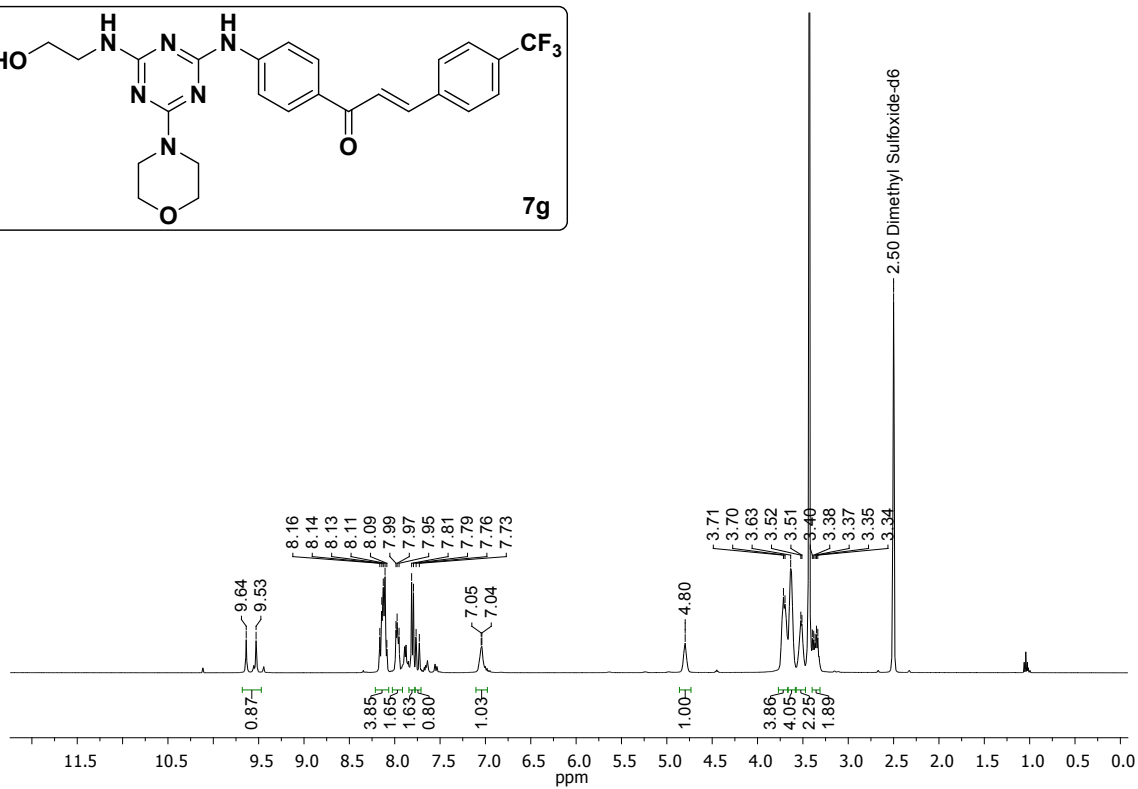

<sup>1</sup>H NMR (400 MHz, DMSO-*d*<sub>6</sub>) spectrum of **7g**.

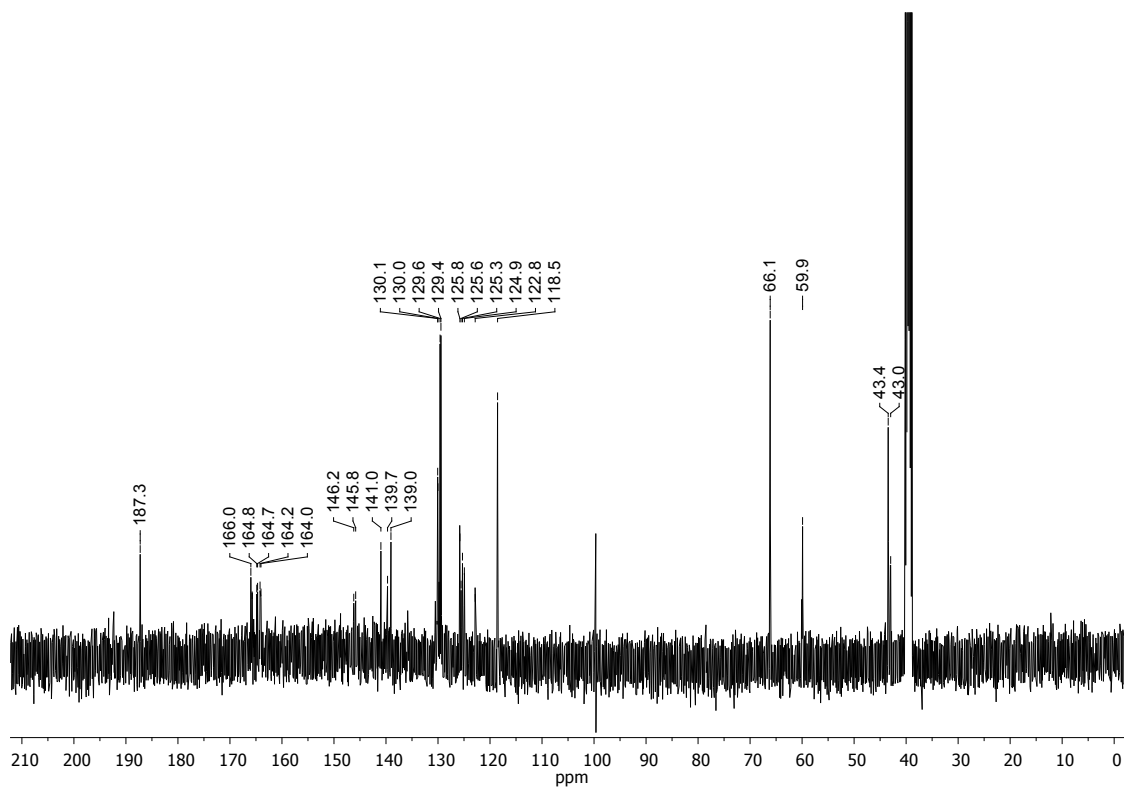

<sup>13</sup>C NMR (100 MHz, DMSO-*d*<sub>6</sub>) spectrum of **7g**.

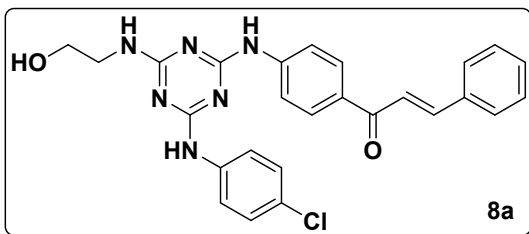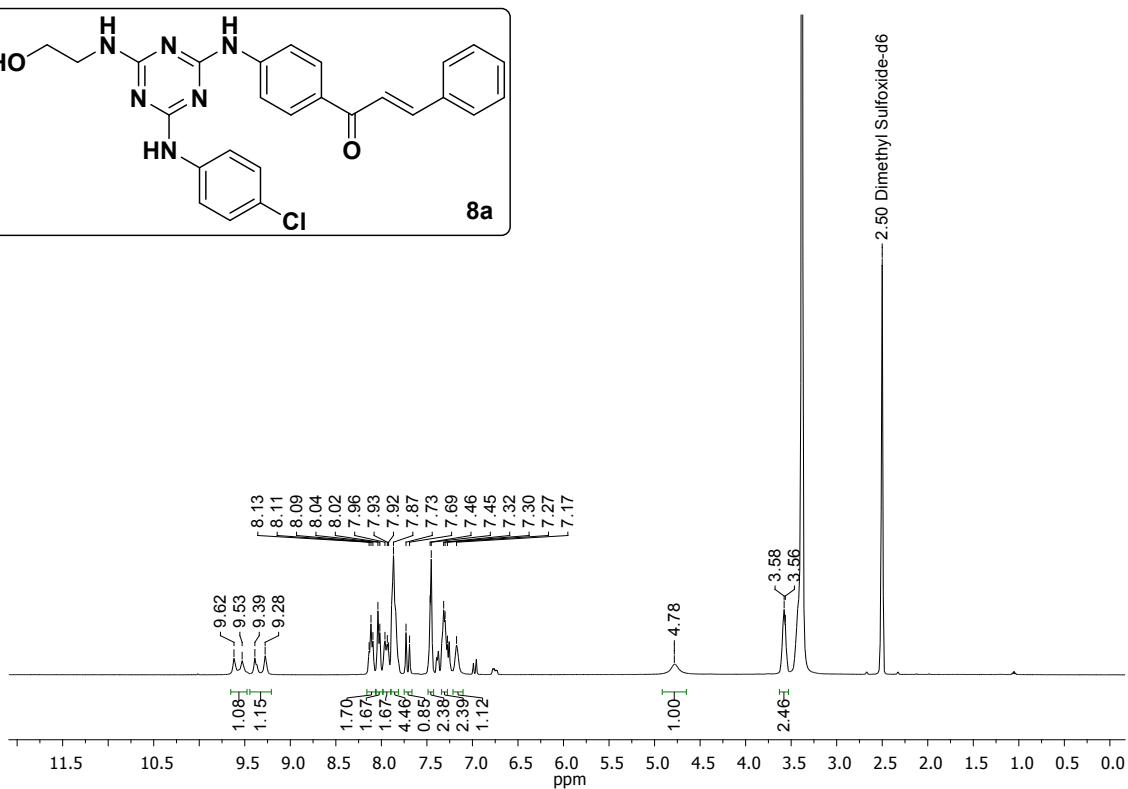

<sup>1</sup>H NMR (400 MHz, DMSO-*d*<sub>6</sub>) spectrum of **8a**.

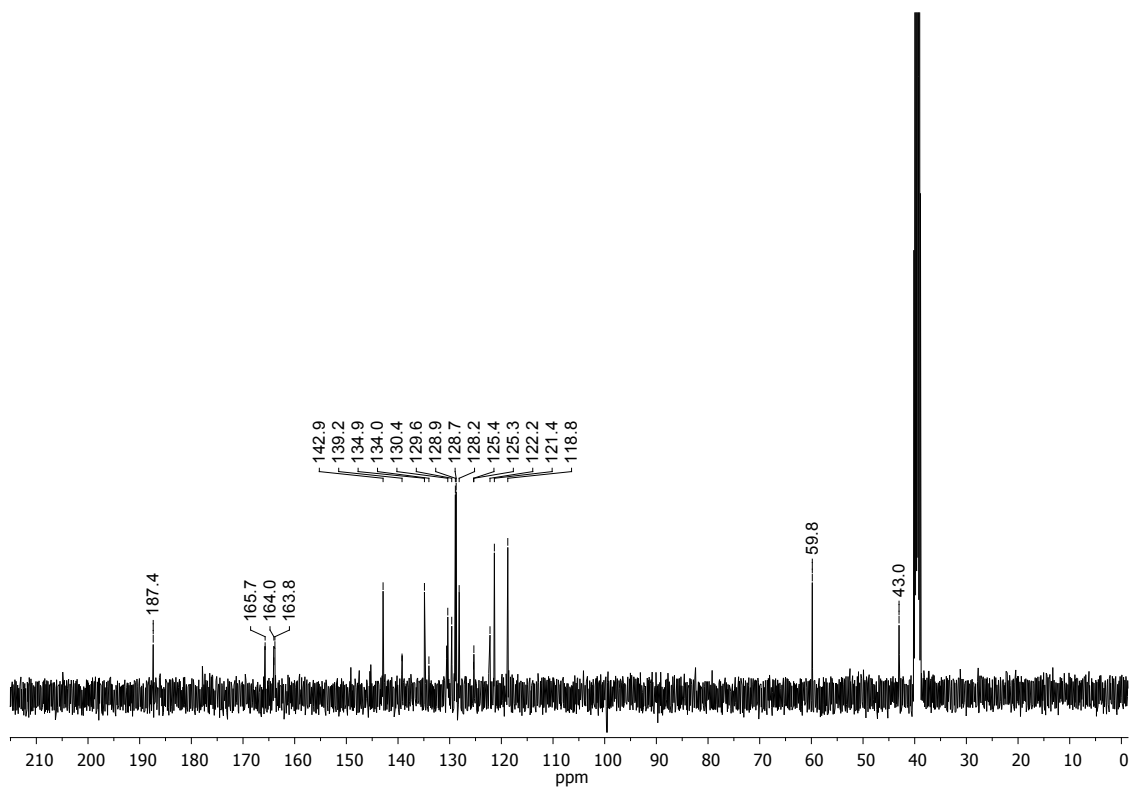

<sup>13</sup>C NMR (100 MHz, DMSO-*d*<sub>6</sub>) spectrum of **8a**.

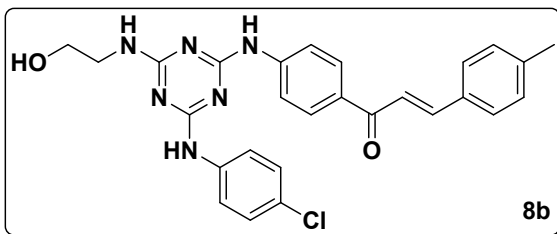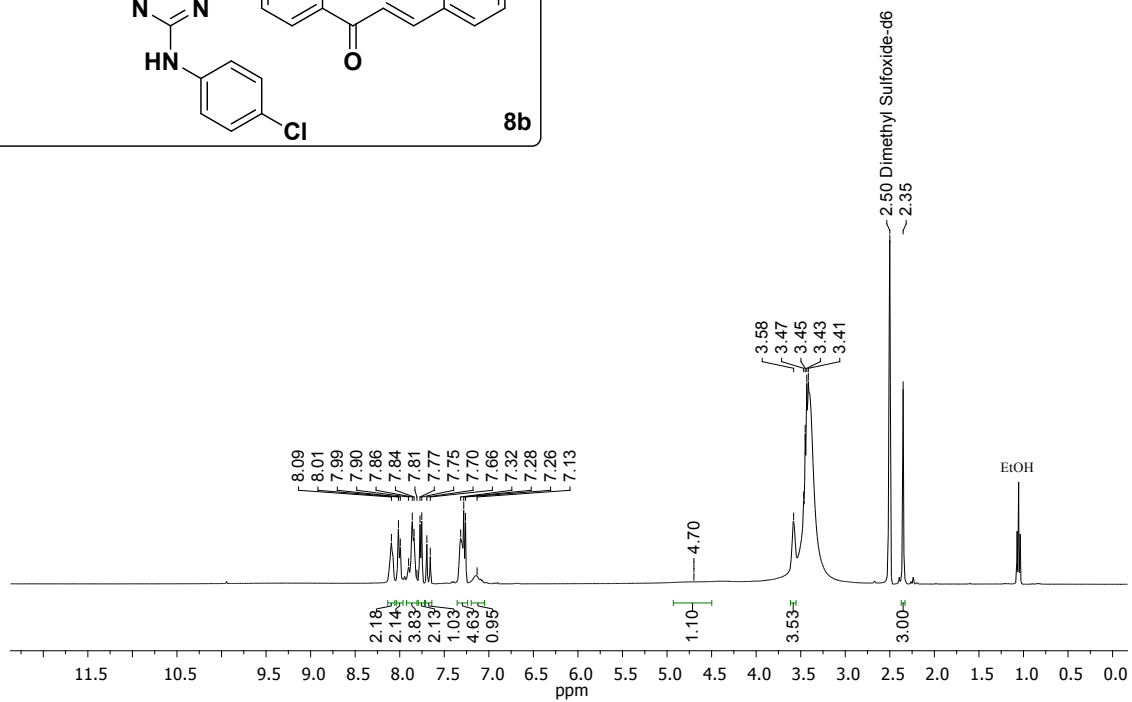

$^1\text{H}$  NMR (400 MHz,  $\text{DMSO-}d_6$ ) spectrum of **8b**.

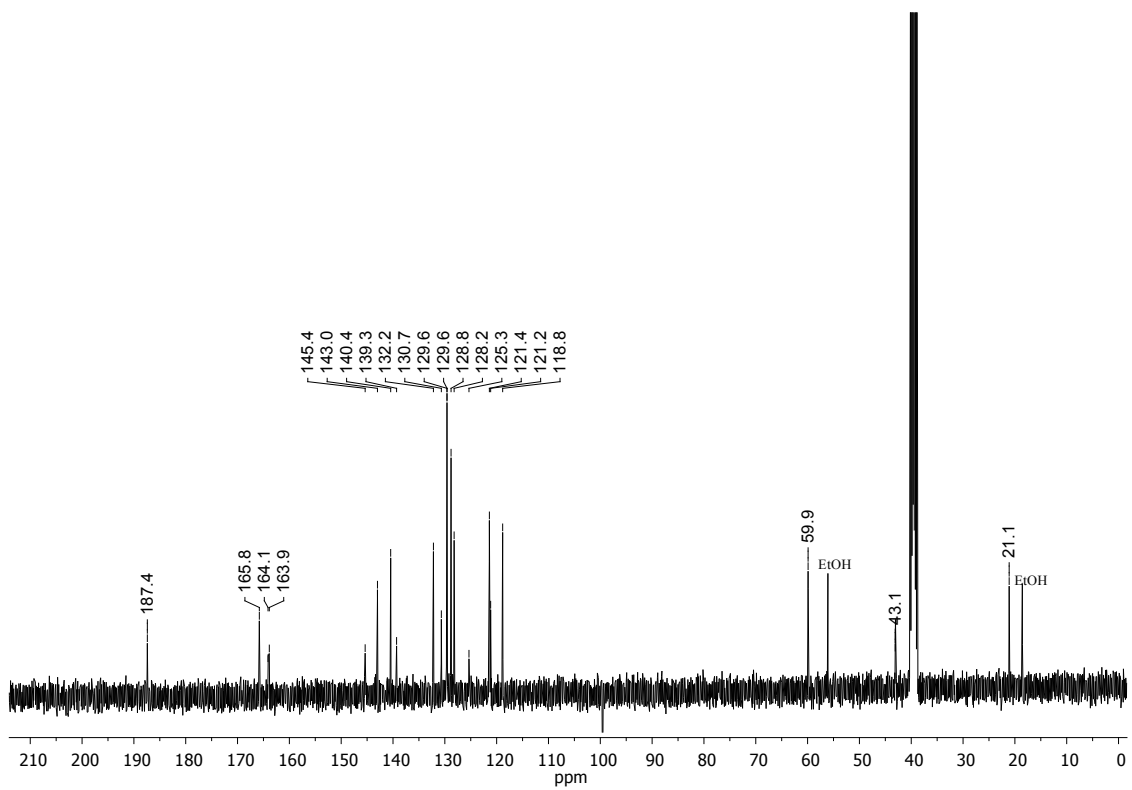

$^{13}\text{C}$  NMR (100 MHz,  $\text{DMSO-}d_6$ ) spectrum of **8b**.

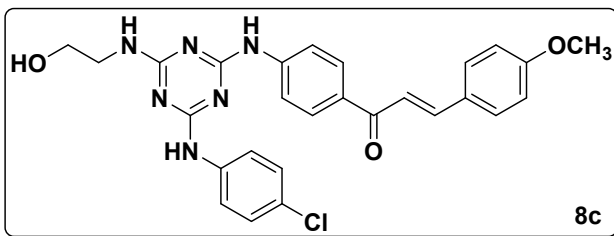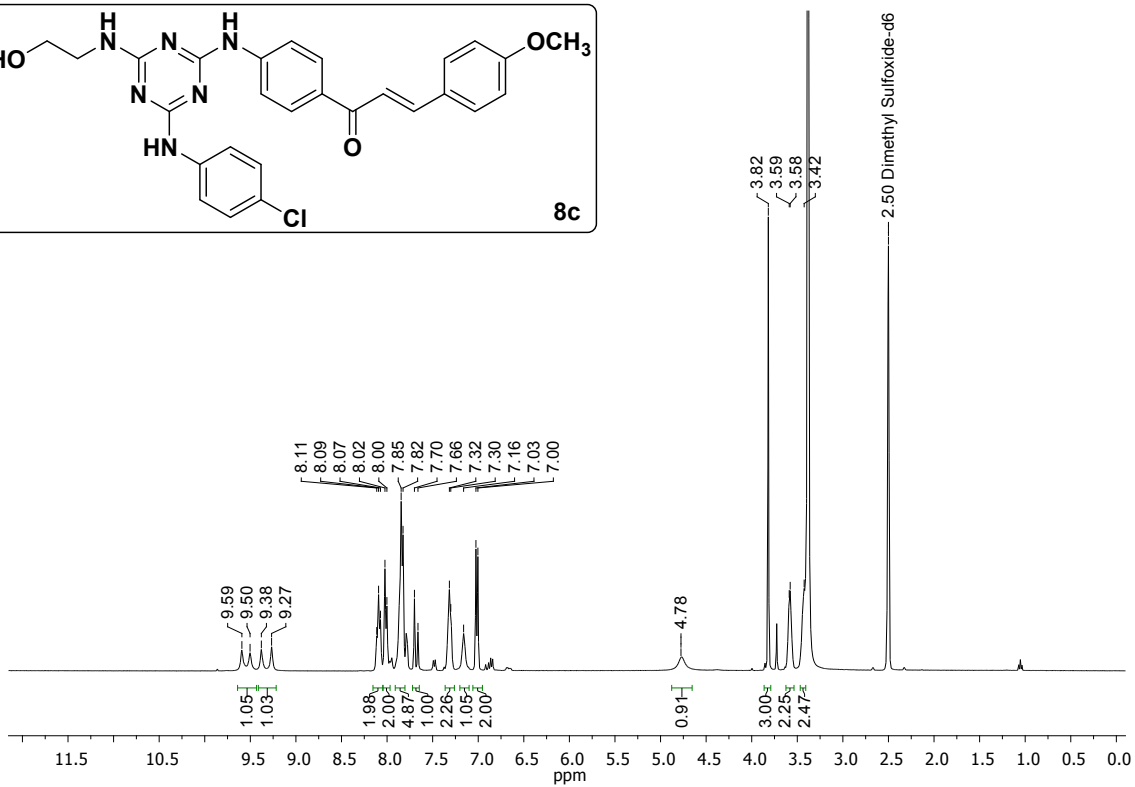

<sup>1</sup>H NMR (400 MHz, DMSO-*d*<sub>6</sub>) spectrum of **8c**.

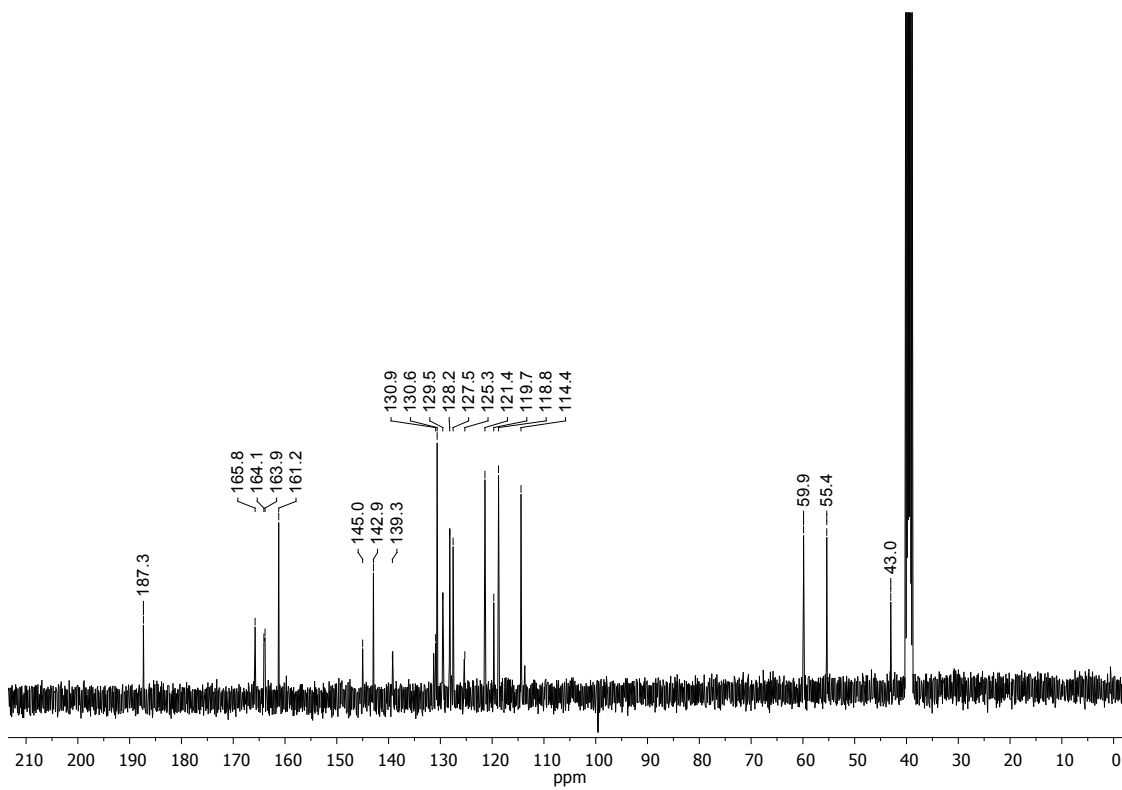

<sup>13</sup>C NMR (100 MHz, DMSO-*d*<sub>6</sub>) spectrum of **8c**.

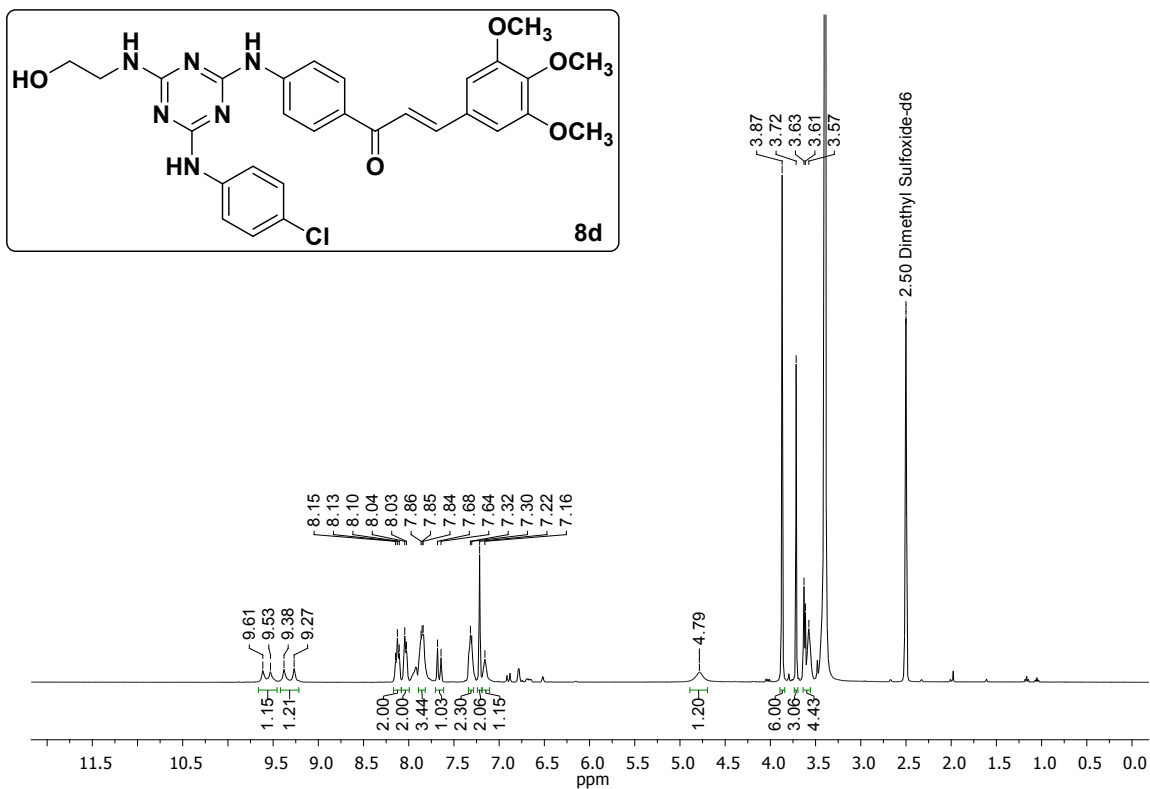

<sup>1</sup>H NMR (400 MHz, DMSO-*d*<sub>6</sub>) spectrum of **8d**.

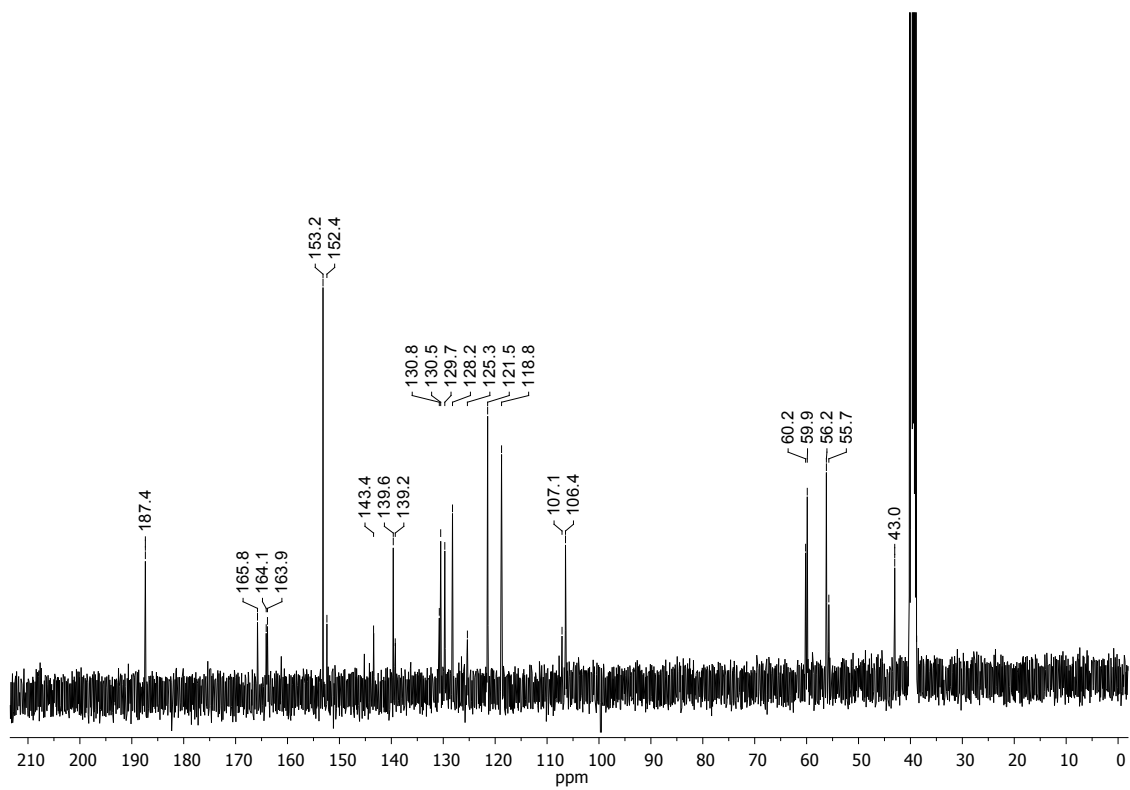

<sup>13</sup>C NMR (100 MHz, DMSO-*d*<sub>6</sub>) spectrum of **8d**.



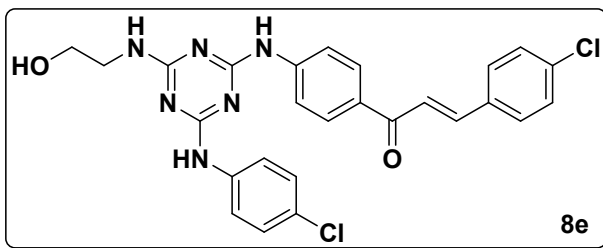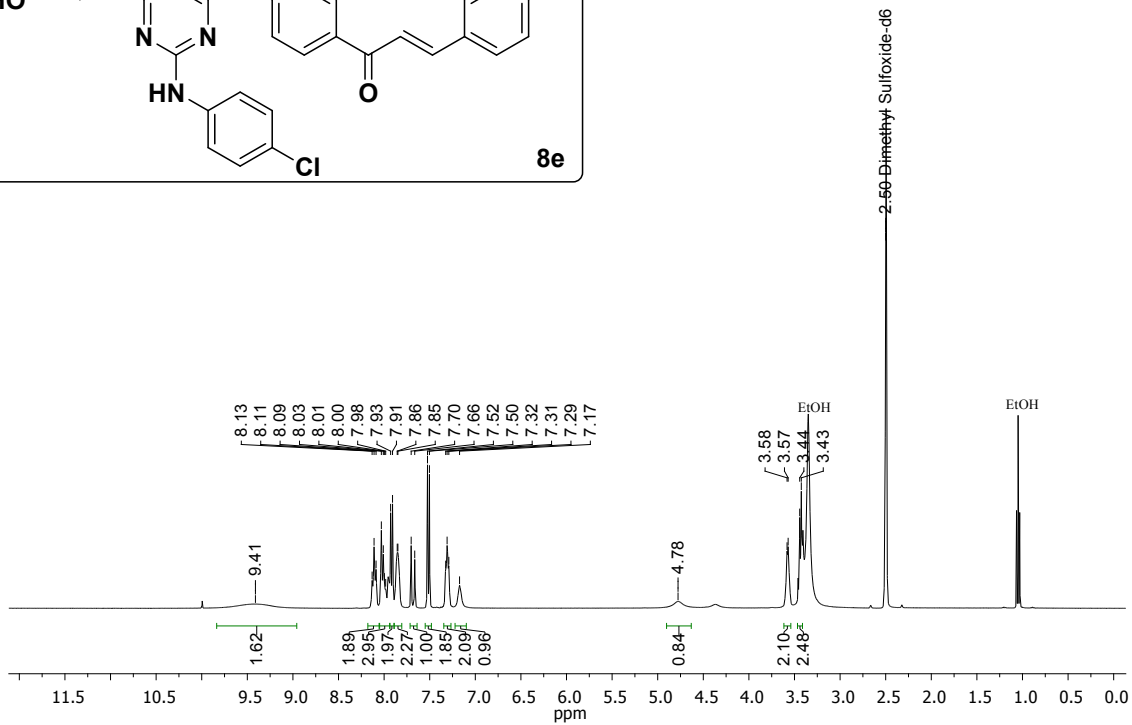

$^1\text{H}$  NMR (400 MHz,  $\text{DMSO}-d_6$ ) spectrum of **8e**.

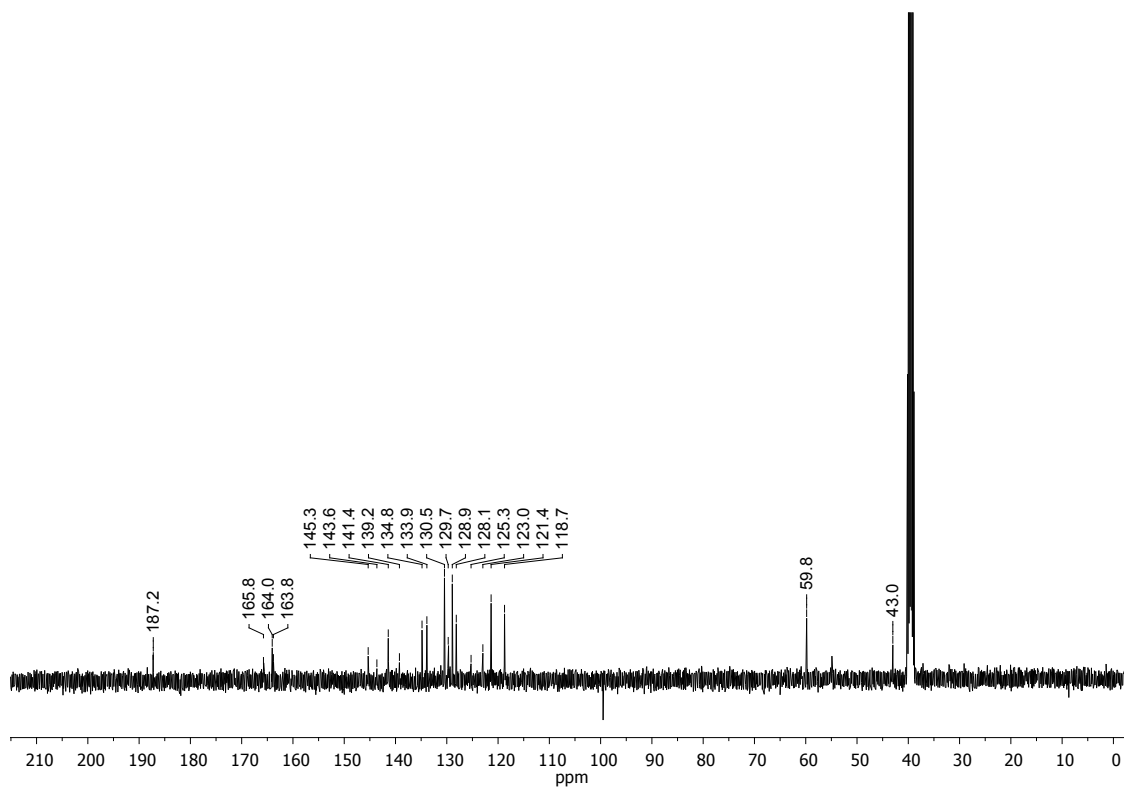

$^{13}\text{C}$  NMR (100 MHz,  $\text{DMSO}-d_6$ ) spectrum of **8e**.

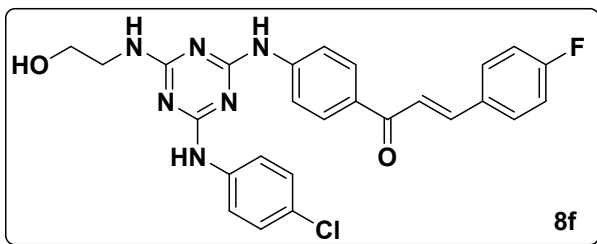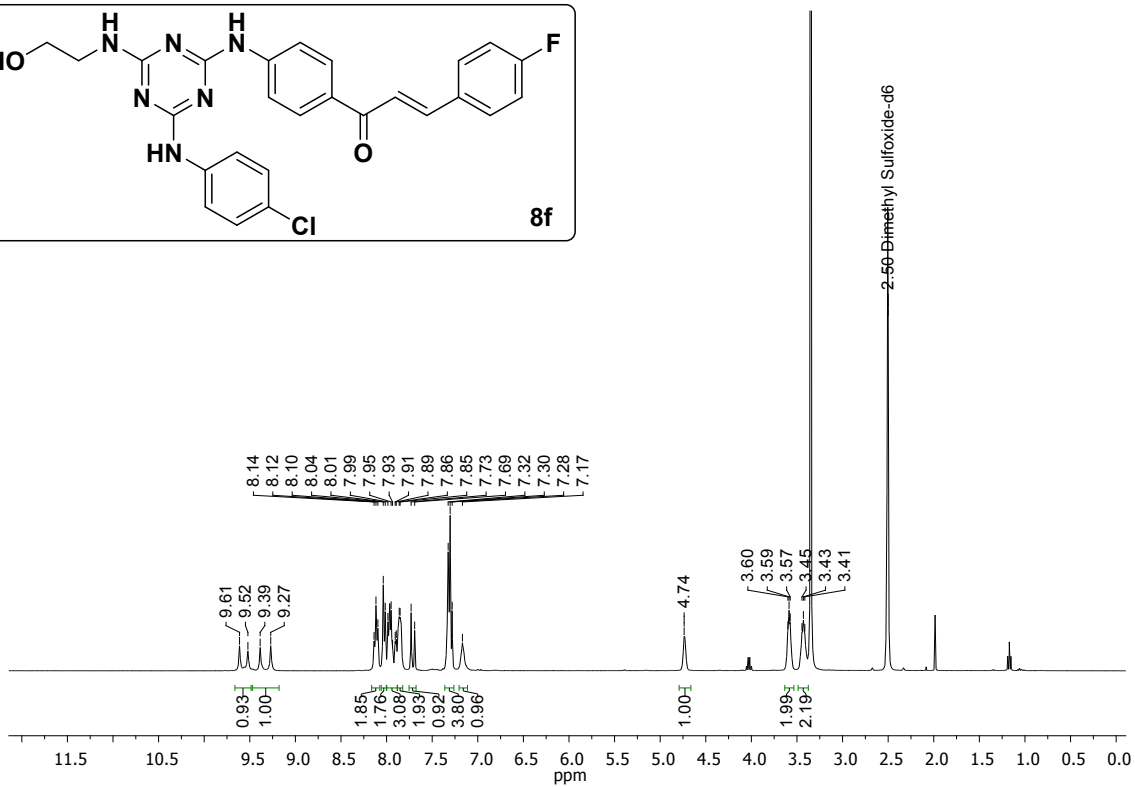

<sup>1</sup>H NMR (400 MHz, DMSO-*d*<sub>6</sub>) spectrum of **8f**.

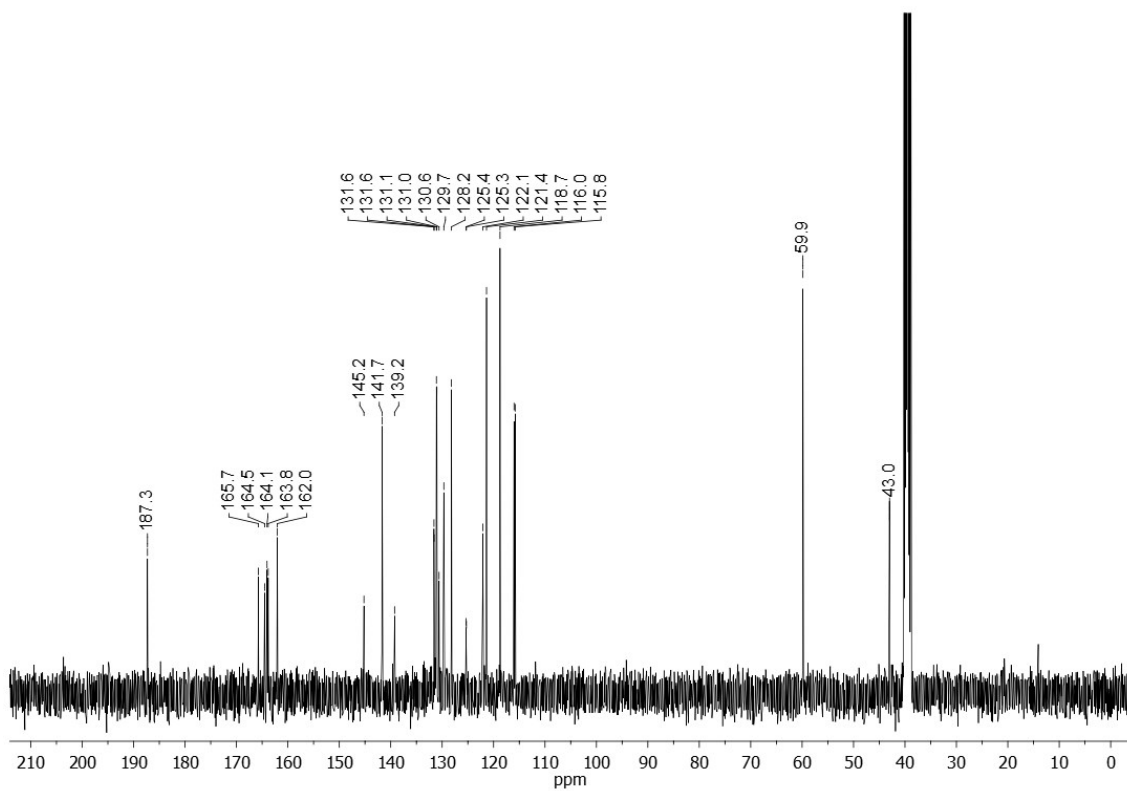

<sup>13</sup>C NMR (100 MHz, DMSO-*d*<sub>6</sub>) spectrum of **8f**.

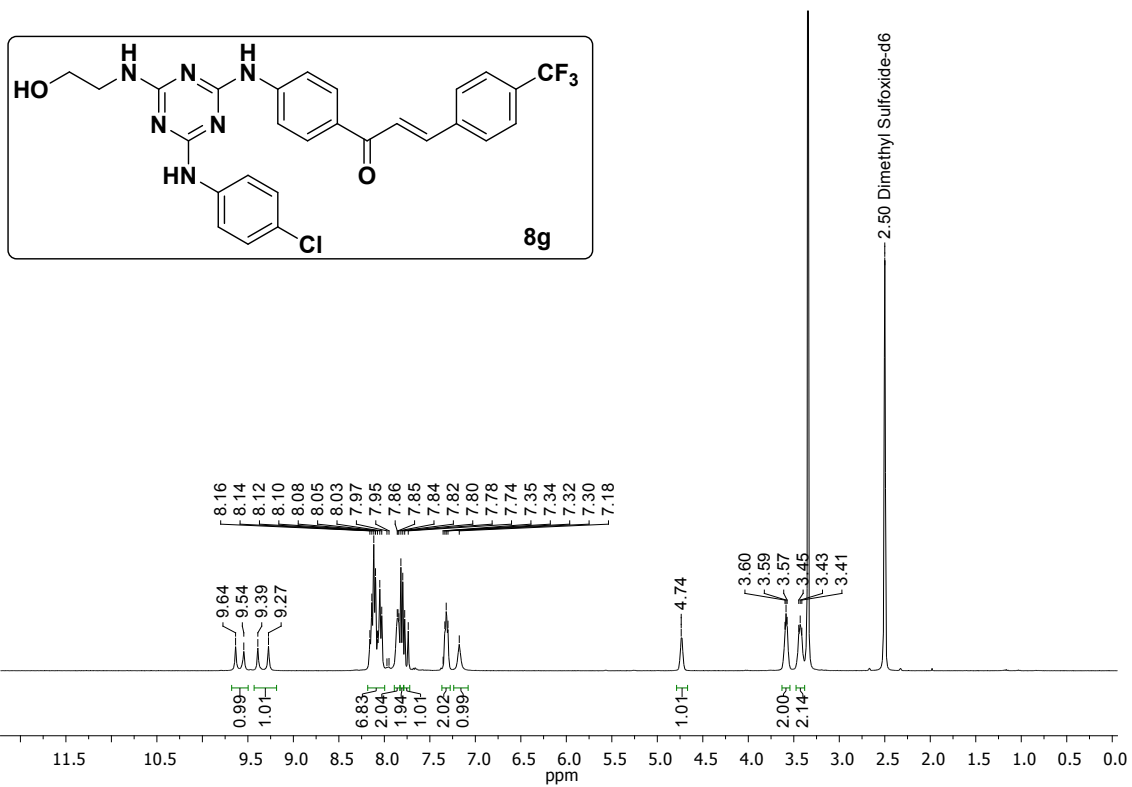

$^1\text{H}$  NMR (400 MHz,  $\text{DMSO}-d_6$ ) spectrum of **8g**.

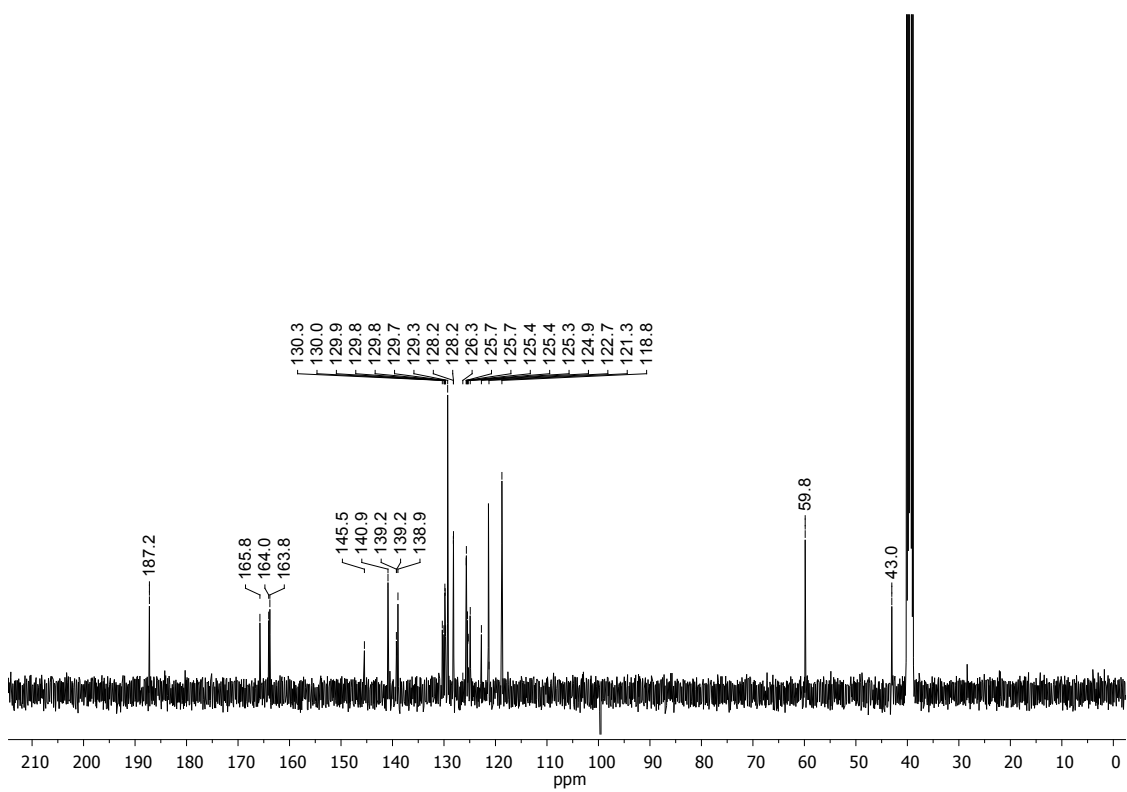

$^{13}\text{C}$  NMR (100 MHz,  $\text{DMSO}-d_6$ ) spectrum of **8g**.

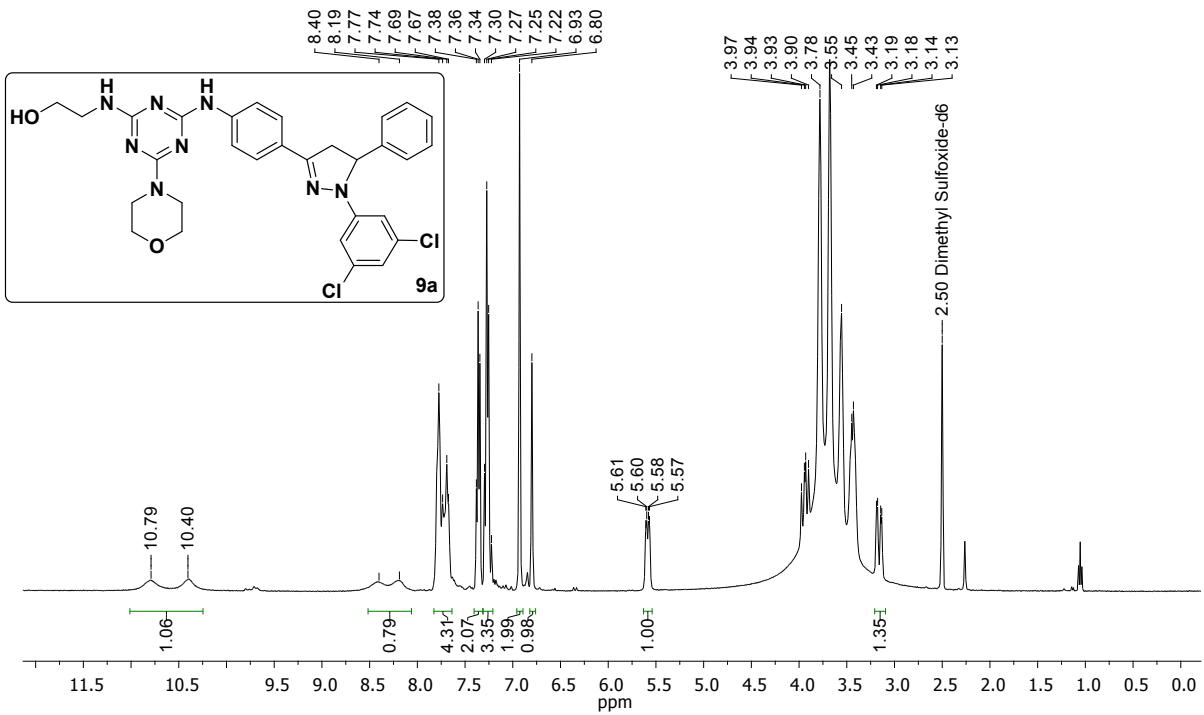

<sup>1</sup>H NMR (400 MHz, DMSO-*d*<sub>6</sub>) spectrum of **9a**.

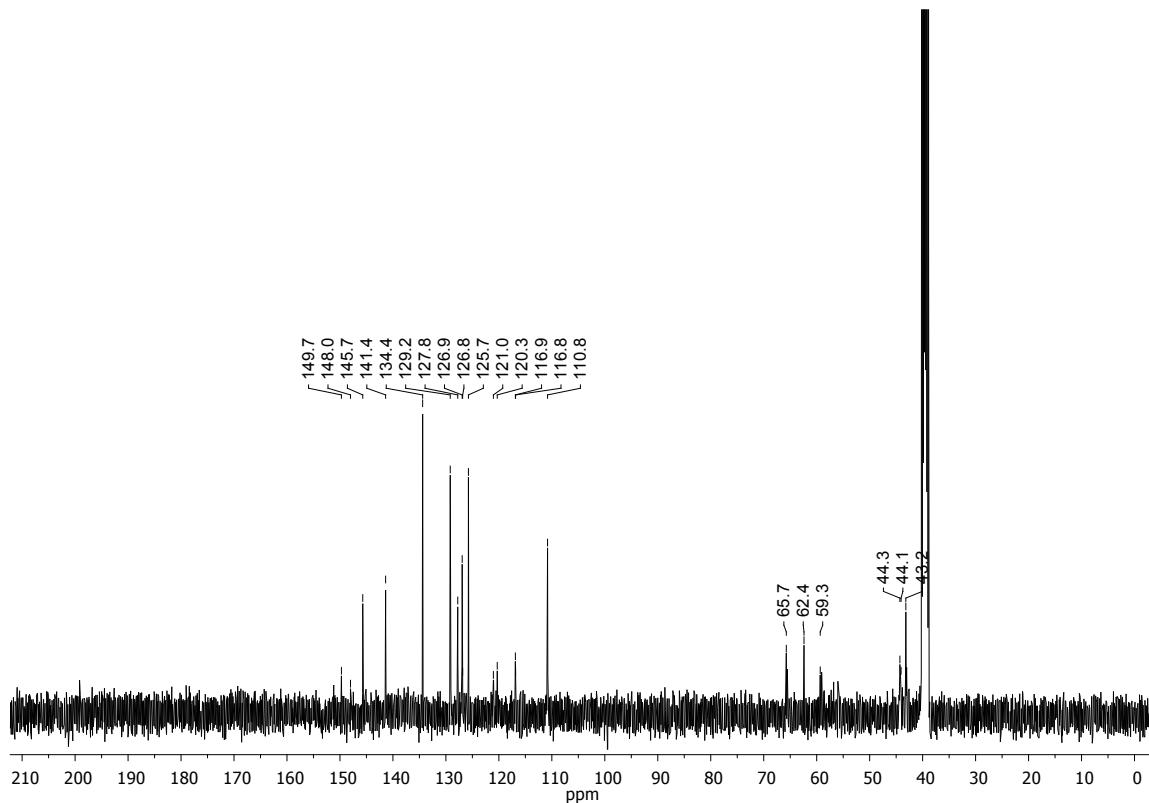

<sup>13</sup>C NMR (100 MHz, DMSO-*d*<sub>6</sub>) spectrum of **9a**.

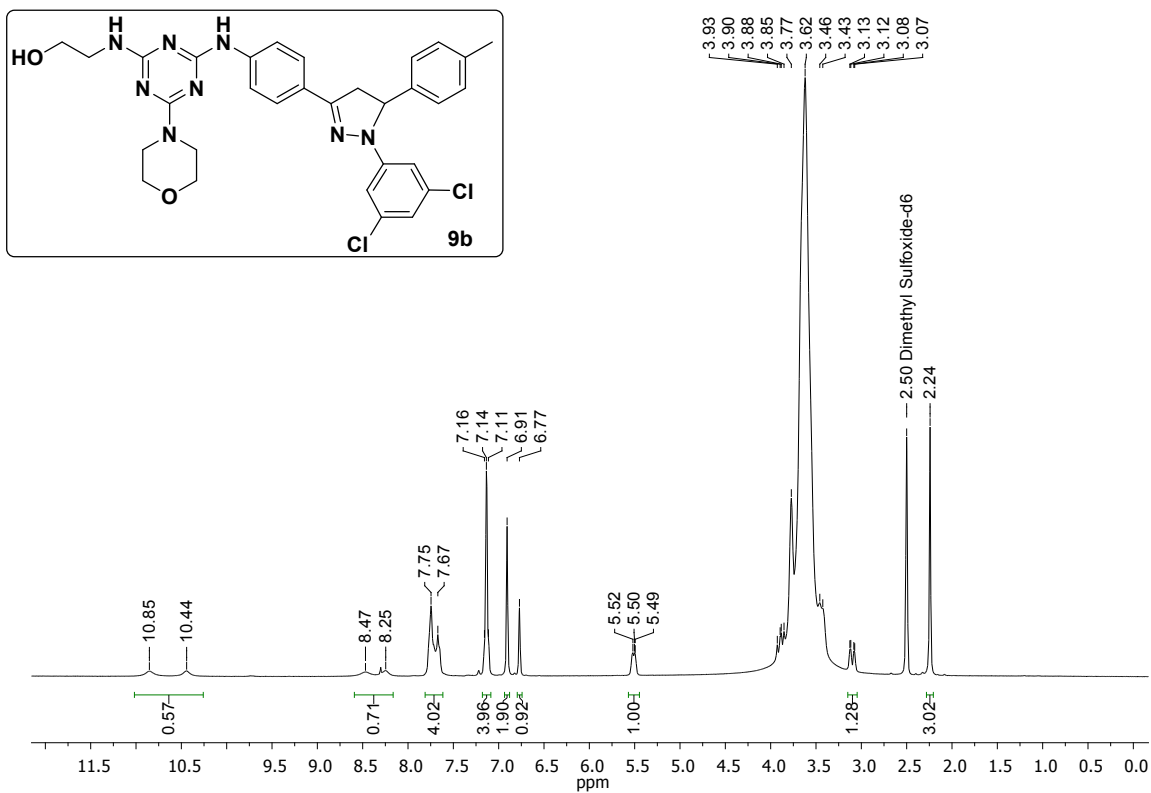

$^1\text{H}$  NMR (400 MHz,  $\text{DMSO-}d_6$ ) spectrum of **9b**.

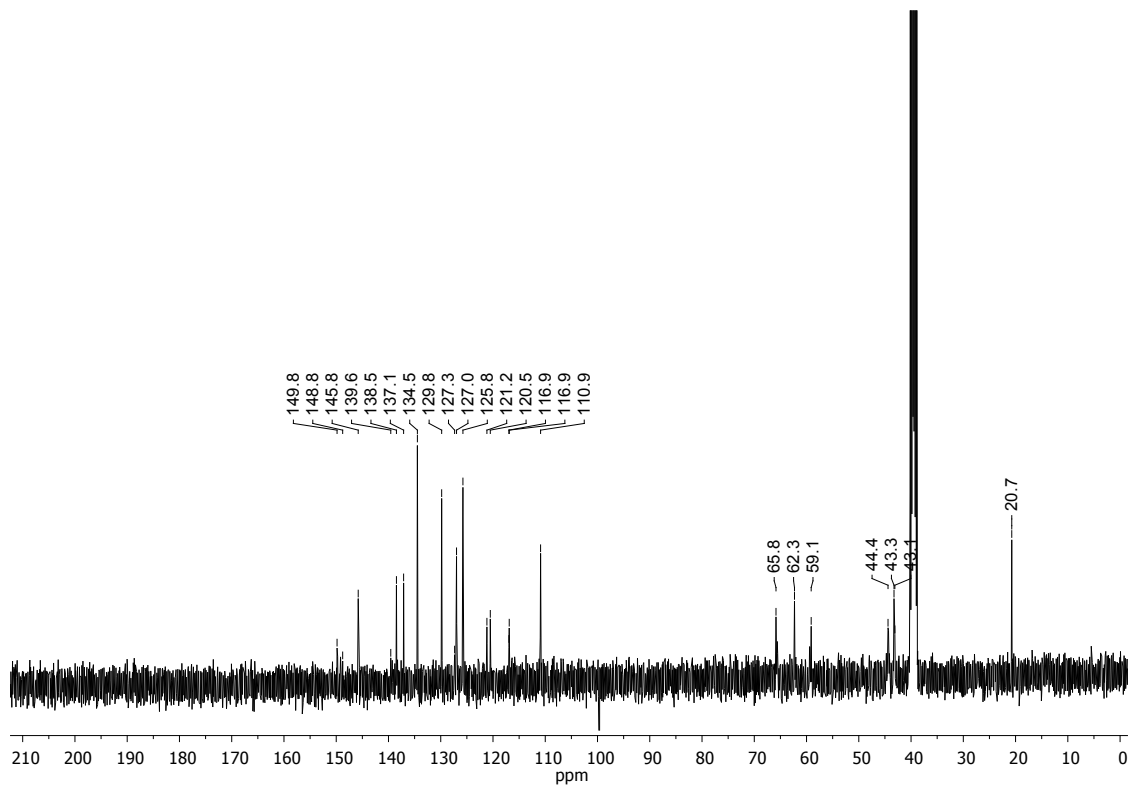

$^{13}\text{C}$  NMR (100 MHz,  $\text{DMSO-}d_6$ ) spectrum of **9b**.

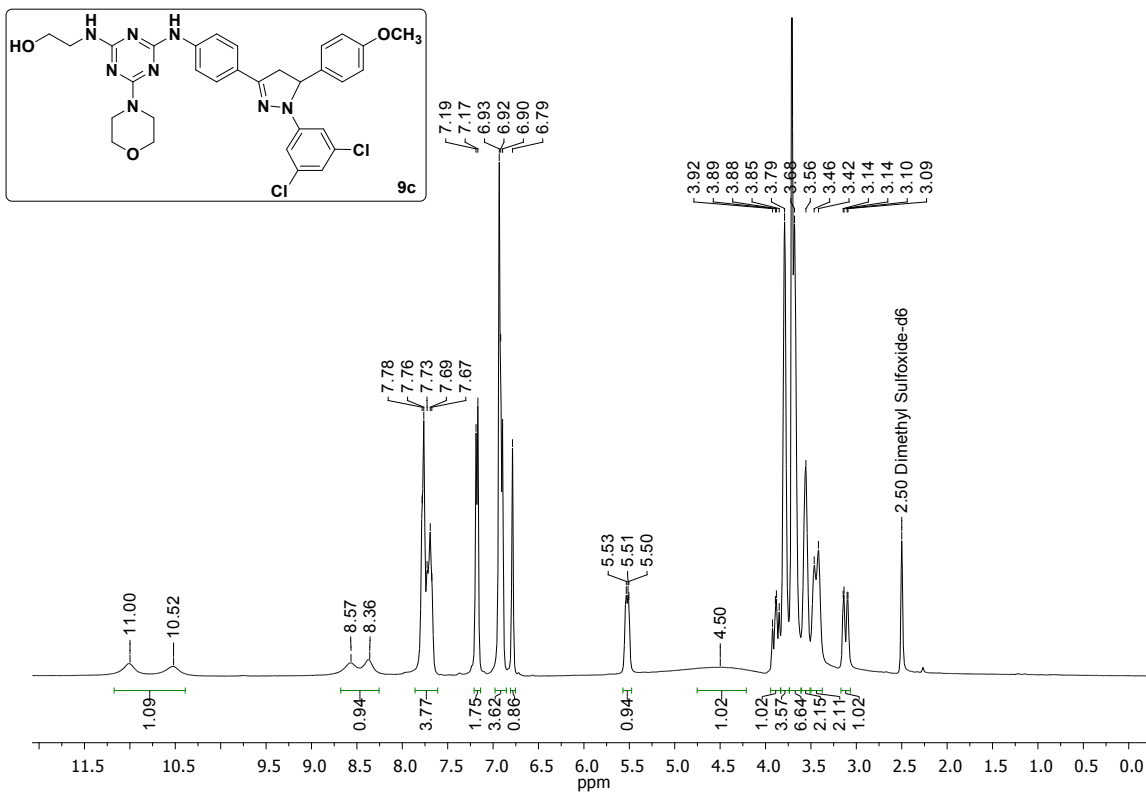

**<sup>1</sup>H NMR (400 MHz, DMSO-*d*<sub>6</sub>) spectrum of 9c.**

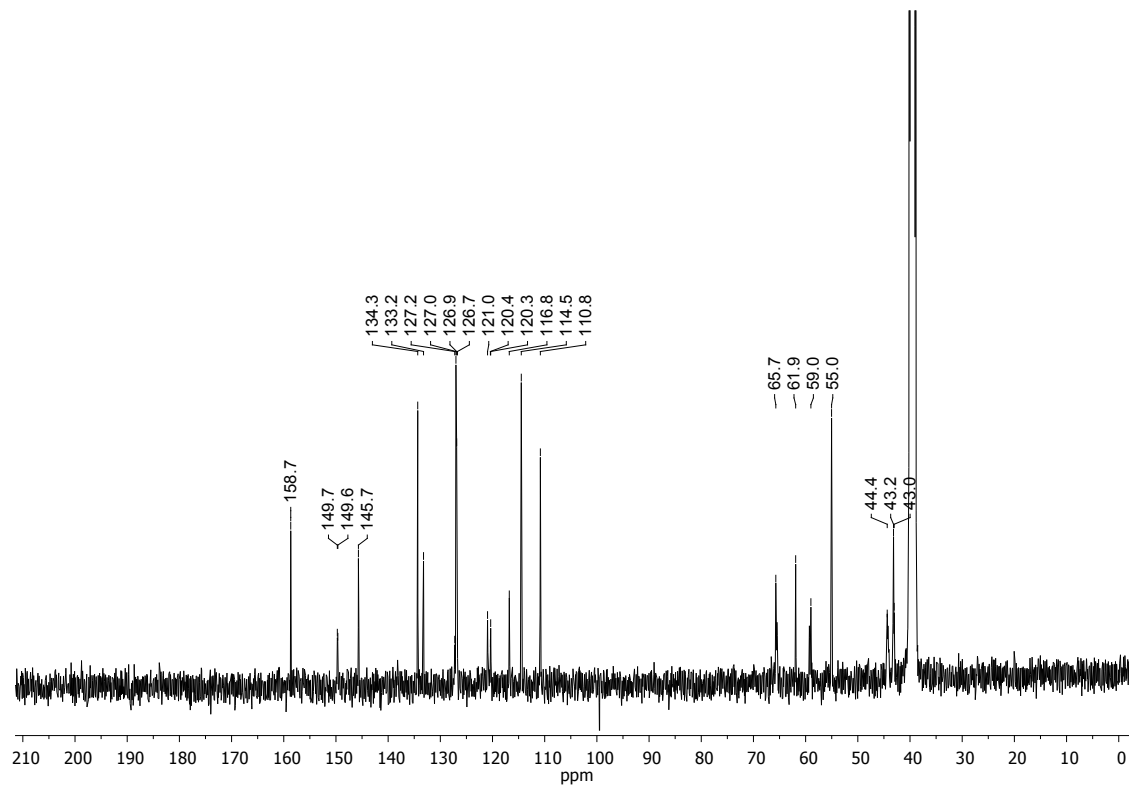

**<sup>13</sup>C NMR (100 MHz, DMSO-*d*<sub>6</sub>) spectrum of 9c.**

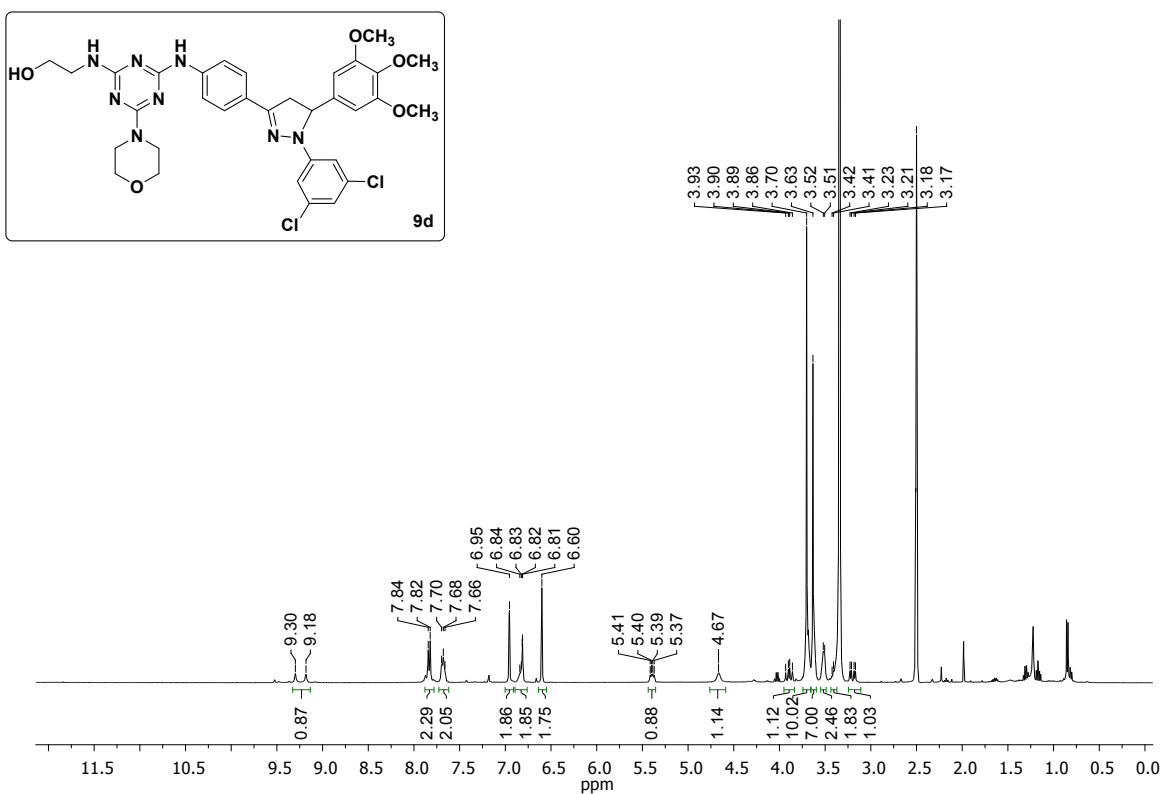

<sup>1</sup>H NMR (400 MHz, DMSO-*d*<sub>6</sub>) spectrum of **9d**.

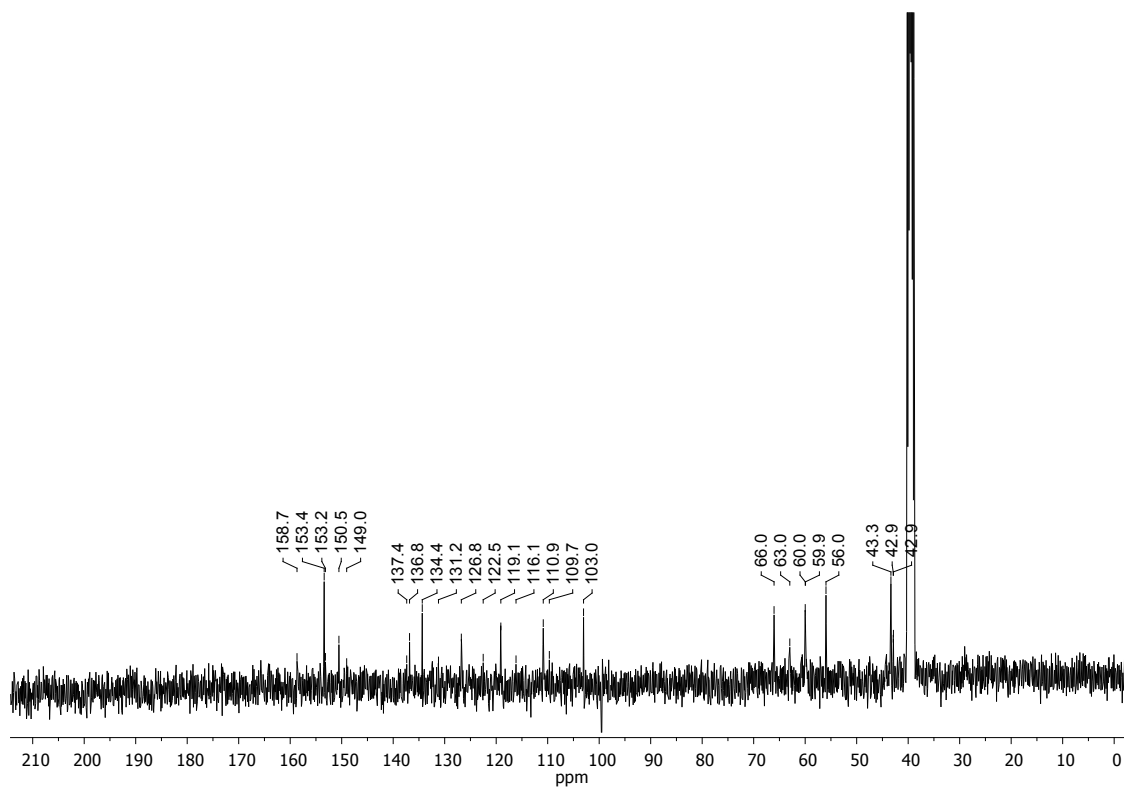

<sup>13</sup>C NMR (100 MHz, DMSO-*d*<sub>6</sub>) spectrum of **9d**.

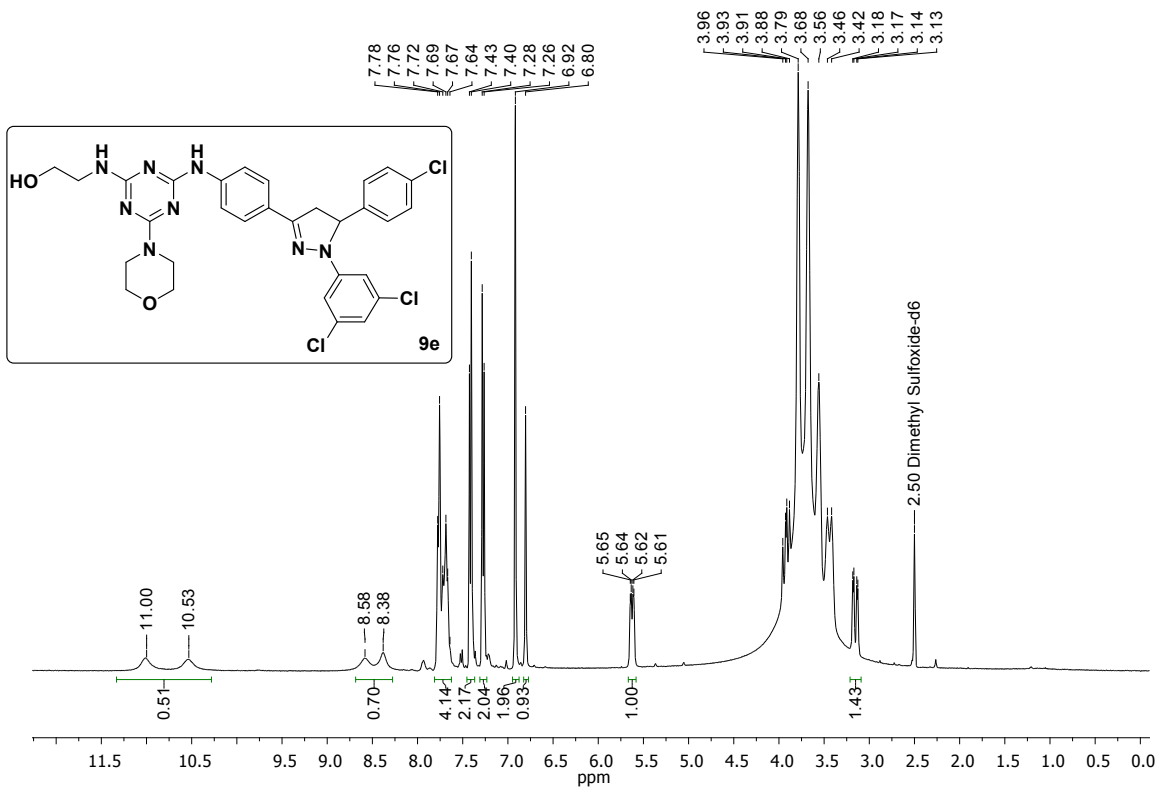

<sup>1</sup>H NMR (400 MHz, DMSO-*d*<sub>6</sub>) spectrum of **9e**.

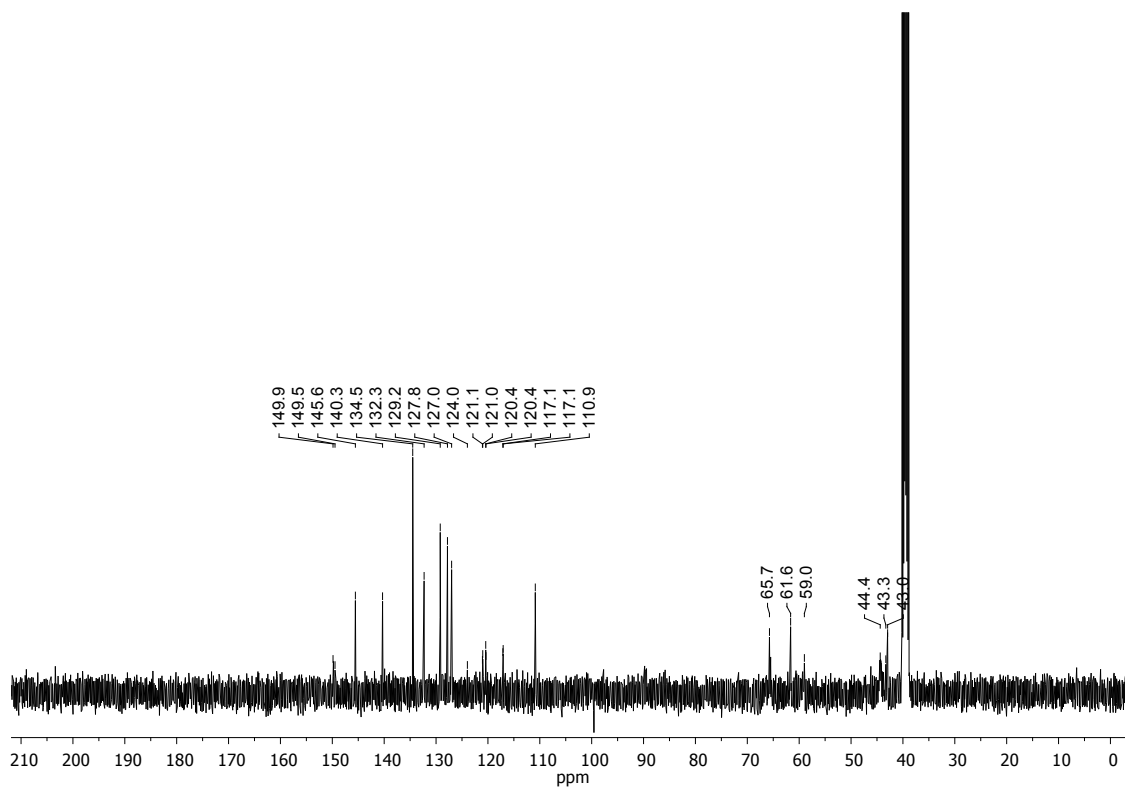

<sup>13</sup>C NMR (100 MHz, DMSO-*d*<sub>6</sub>) spectrum of **9e**.



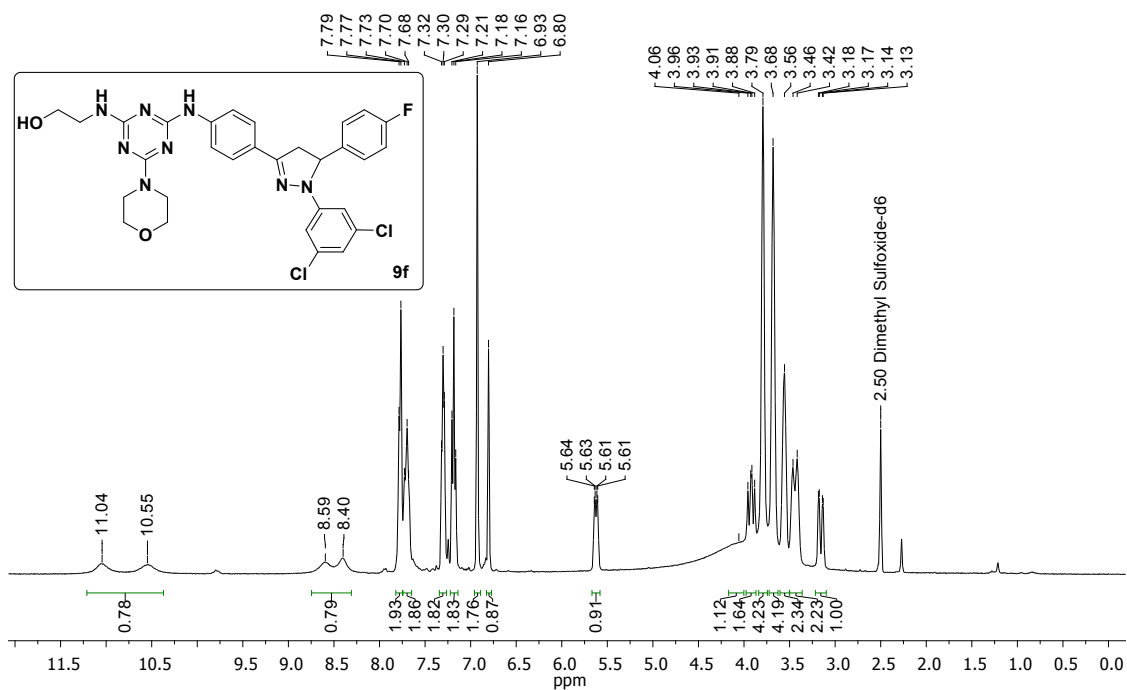

<sup>1</sup>H NMR (400 MHz, DMSO-*d*<sub>6</sub>) spectrum of **9f**.

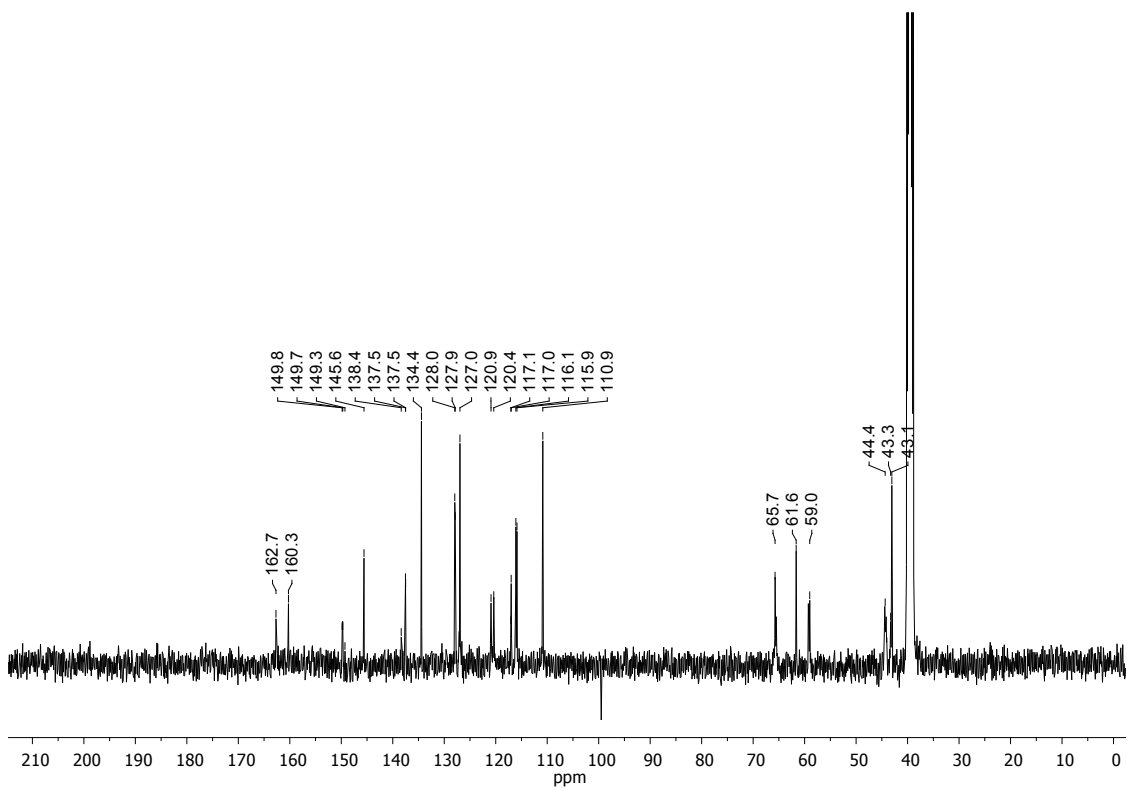

<sup>13</sup>C NMR (100 MHz, DMSO-*d*<sub>6</sub>) spectrum of **9f**.

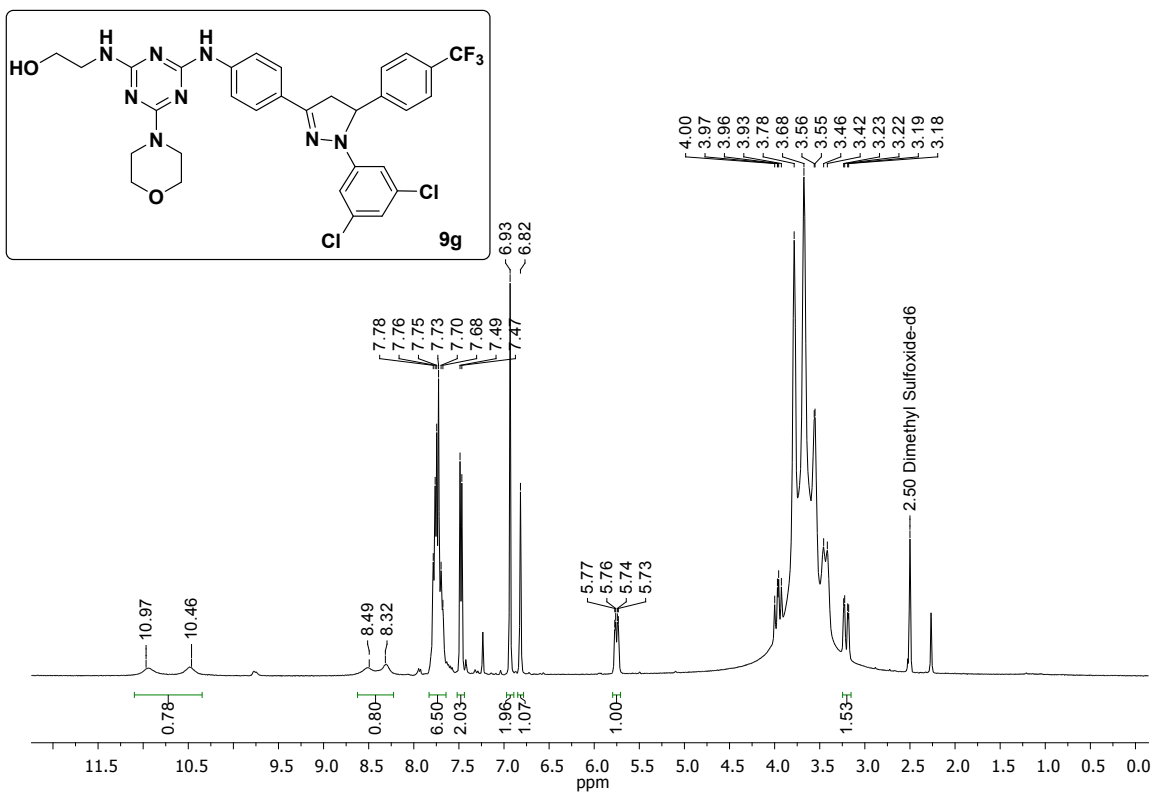

<sup>1</sup>H NMR (400 MHz, DMSO-*d*<sub>6</sub>) spectrum of **9g**.

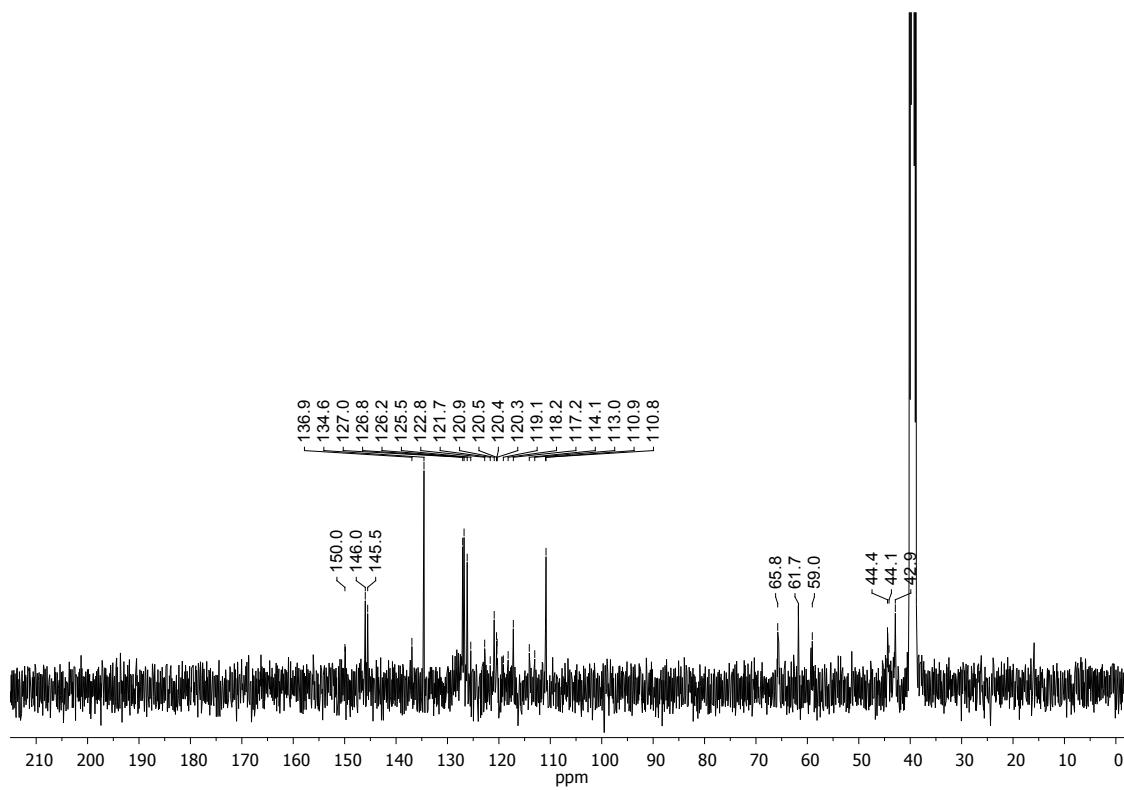

<sup>13</sup>C NMR (100 MHz, DMSO-*d*<sub>6</sub>) spectrum of **9g**.

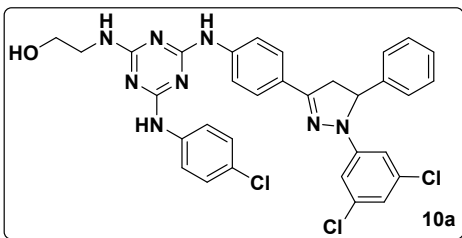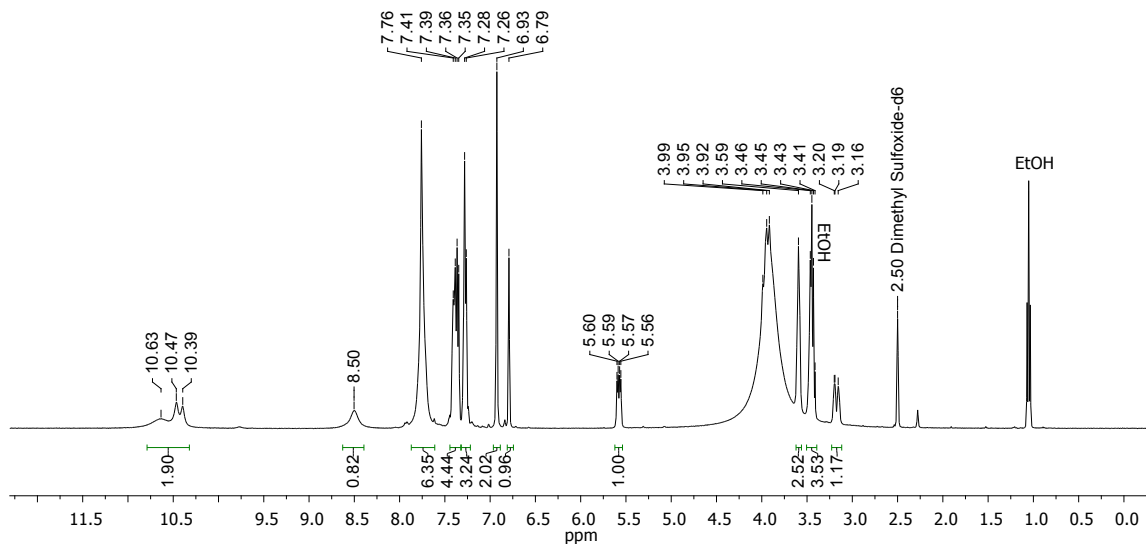

<sup>1</sup>H NMR (400 MHz, DMSO-*d*<sub>6</sub>) spectrum of **10a**.

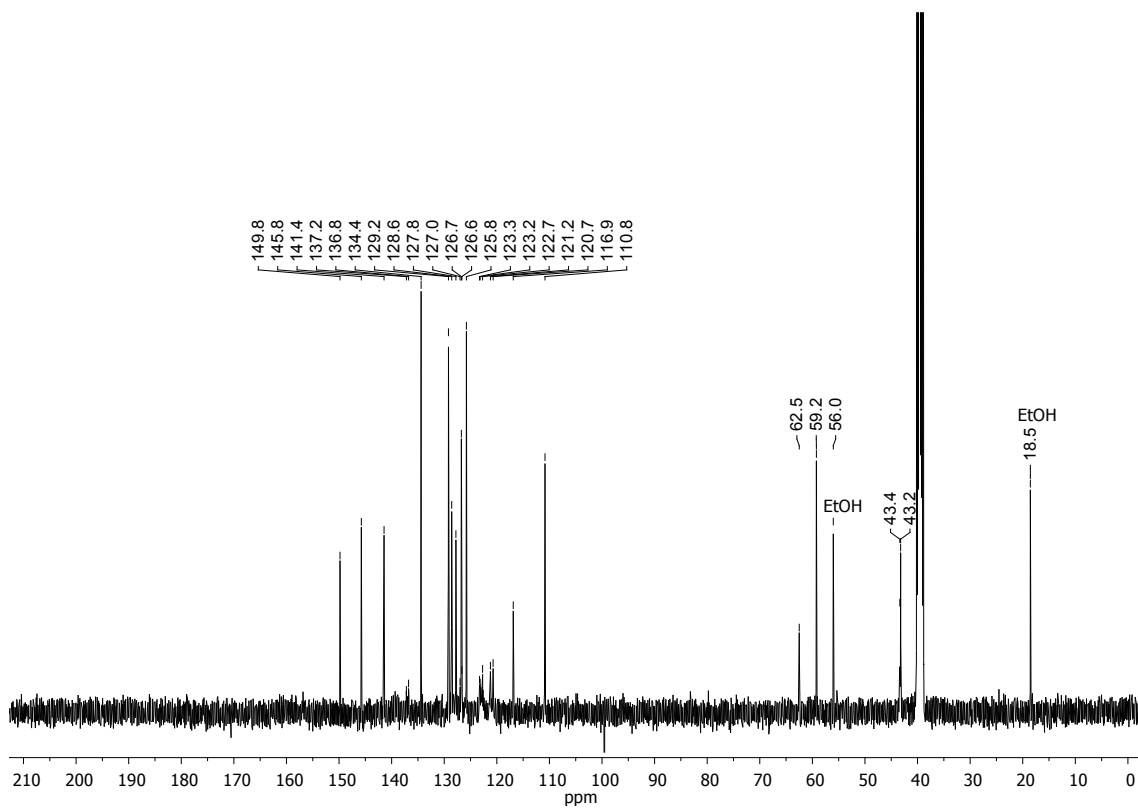

<sup>13</sup>C NMR (100 MHz, DMSO-*d*<sub>6</sub>) spectrum of **10a**.

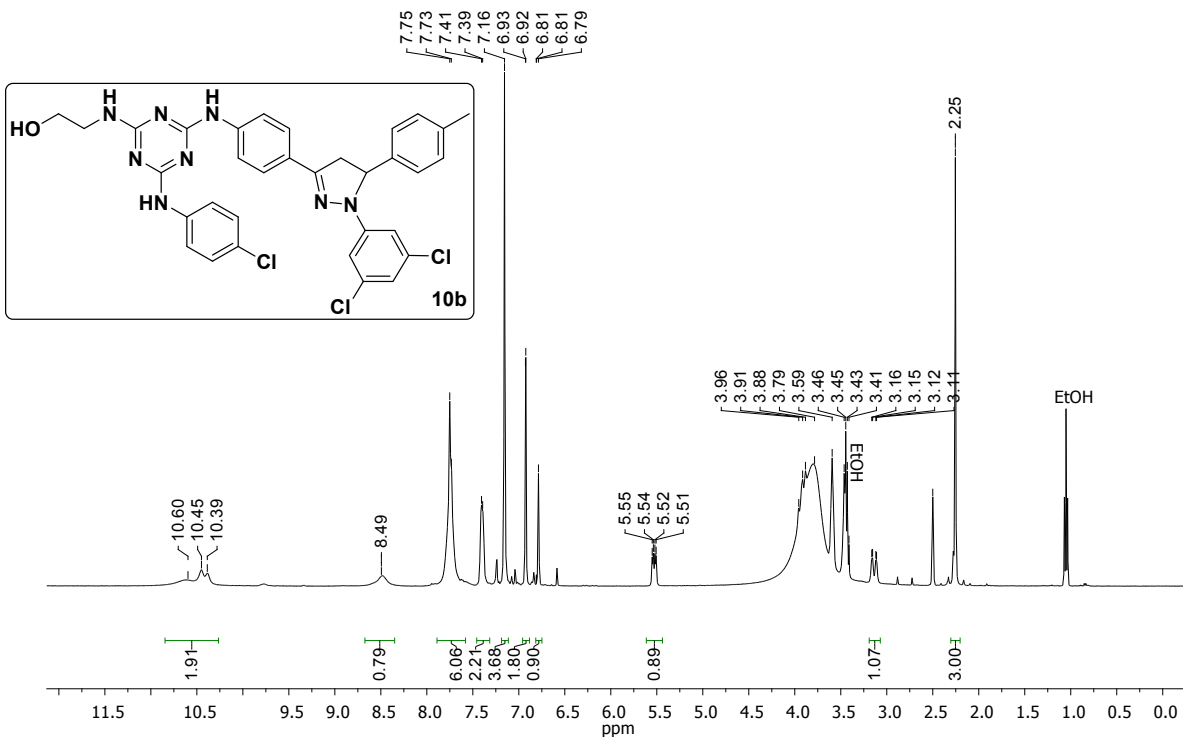

<sup>1</sup>H NMR (400 MHz, DMSO-*d*<sub>6</sub>) spectrum of **10b**.

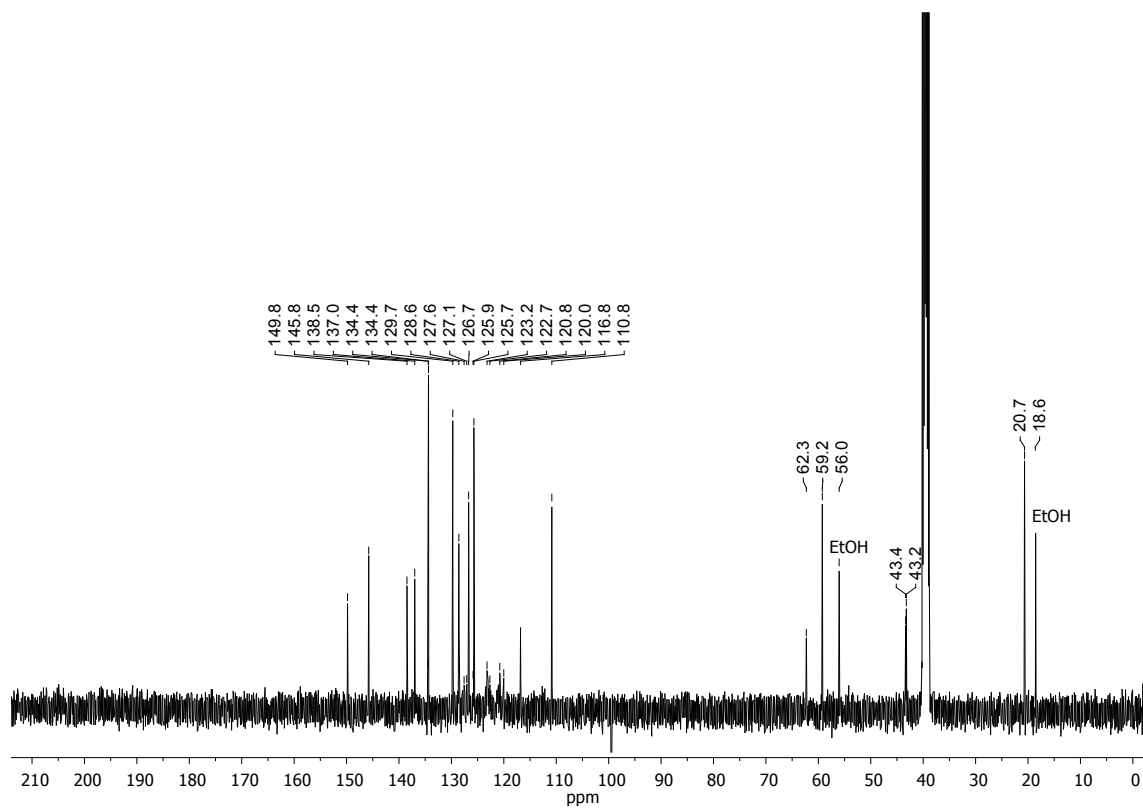

<sup>13</sup>C NMR (100 MHz, DMSO-*d*<sub>6</sub>) spectrum of **10b**.

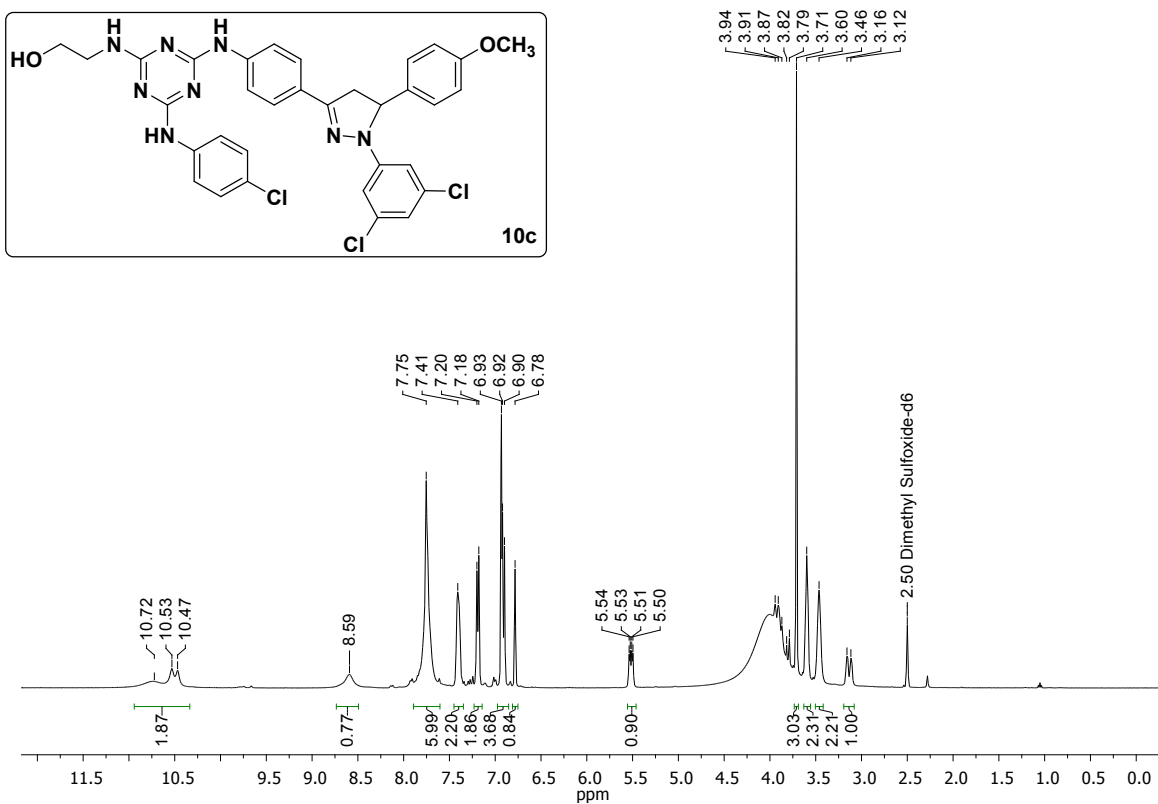

<sup>1</sup>H NMR (400 MHz, DMSO-*d*<sub>6</sub>) spectrum of **10c**.

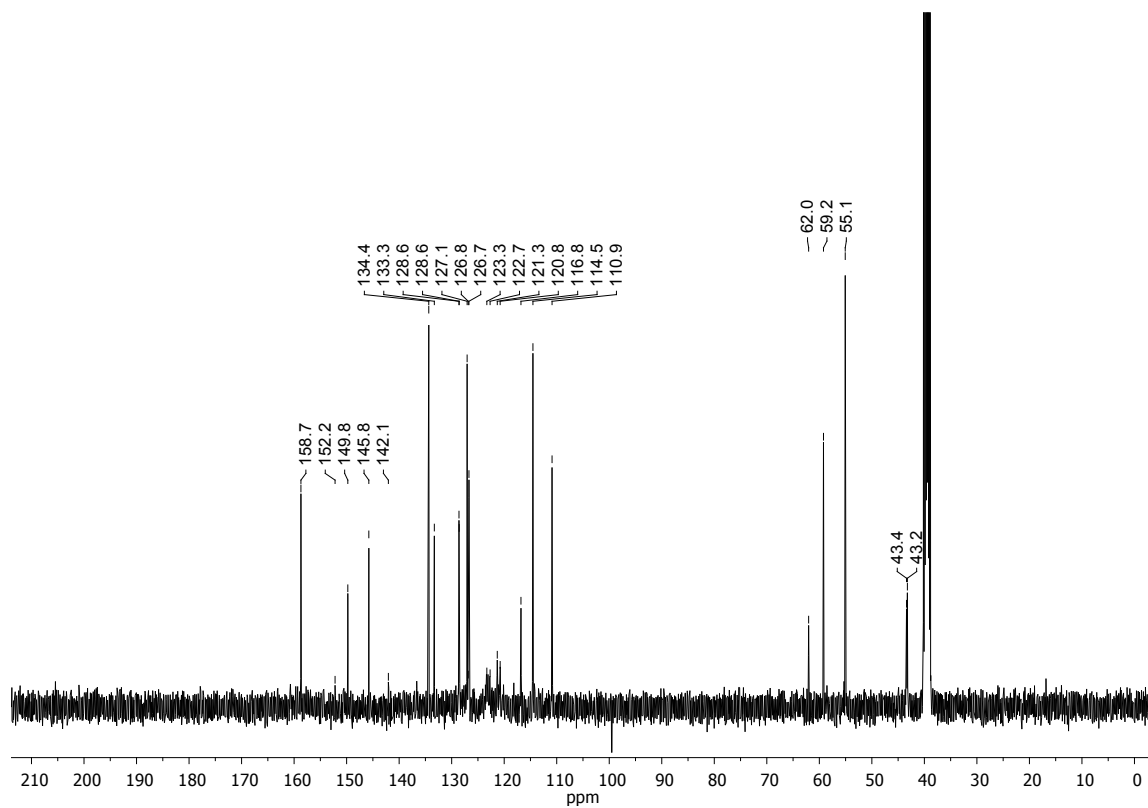

<sup>13</sup>C NMR (100 MHz, DMSO-*d*<sub>6</sub>) spectrum of **10c**.

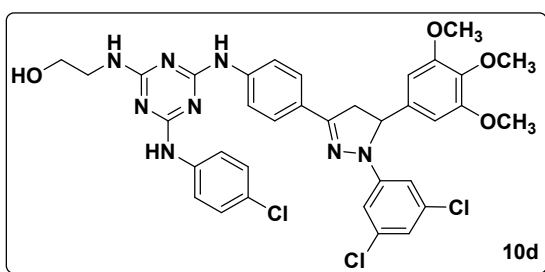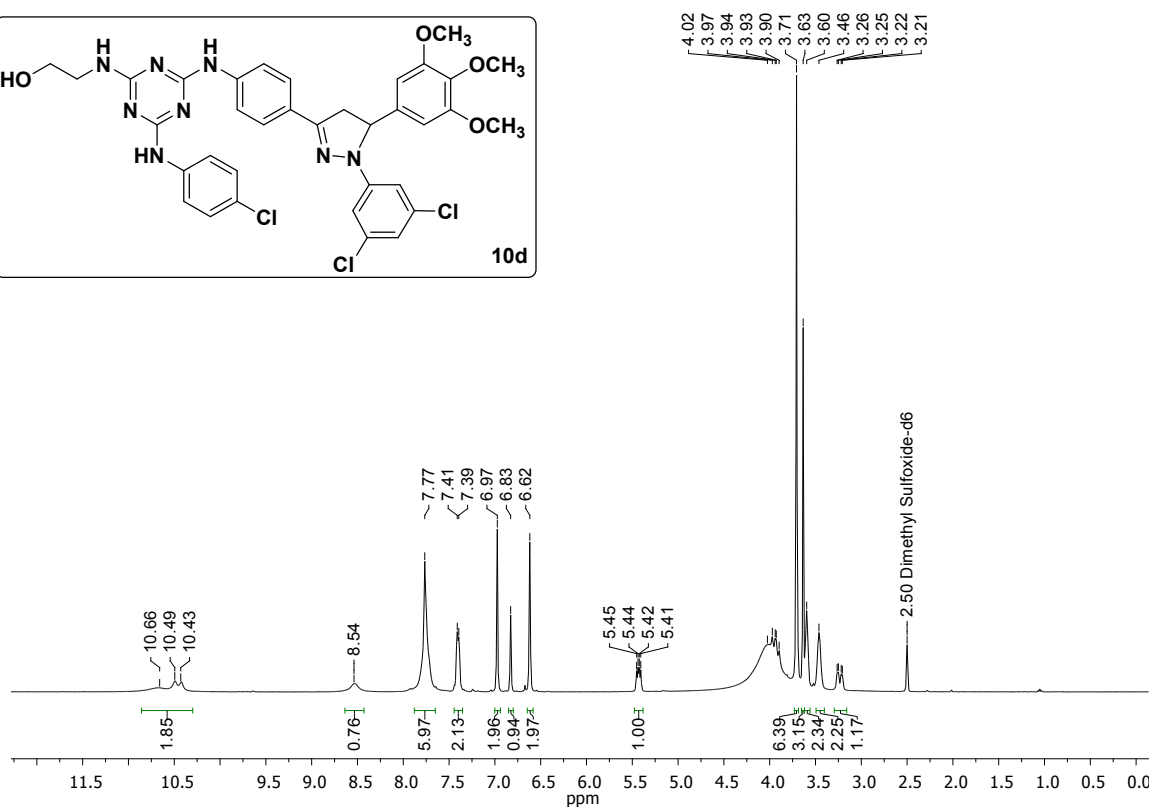

<sup>1</sup>H NMR (400 MHz, DMSO-*d*<sub>6</sub>) spectrum of **10d**.

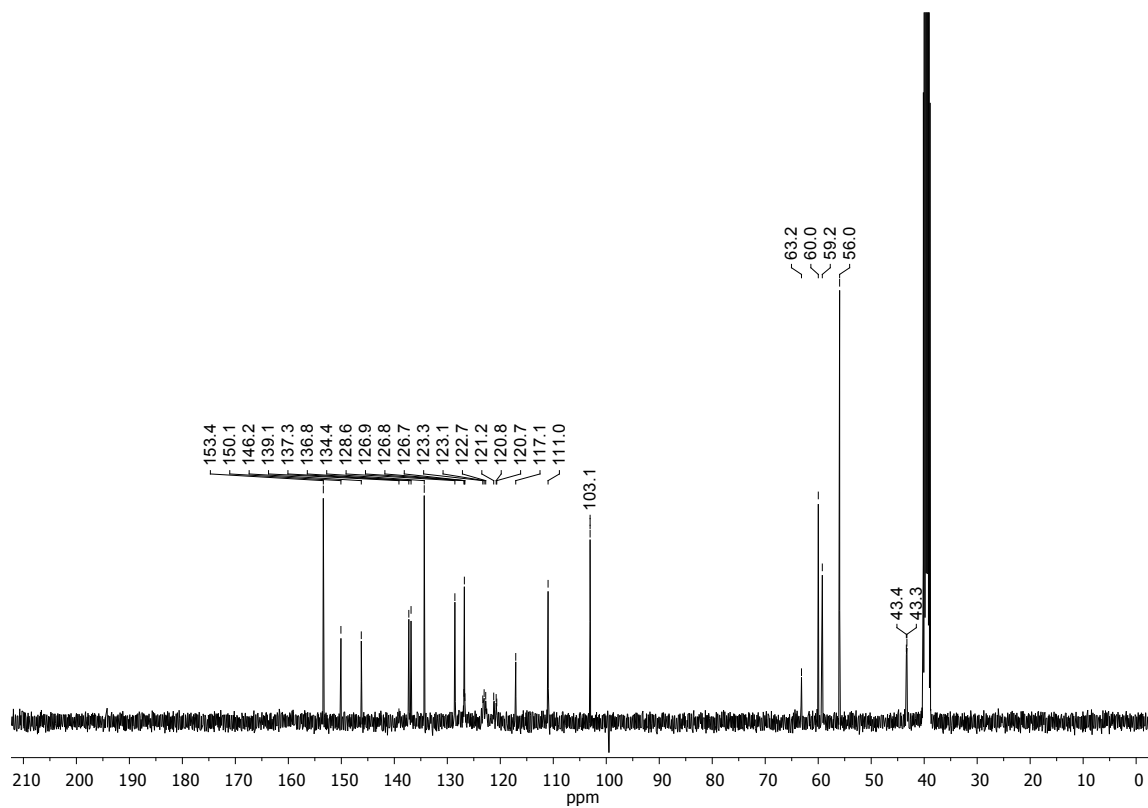

<sup>13</sup>C NMR (100 MHz, DMSO-*d*<sub>6</sub>) spectrum of **10d**.

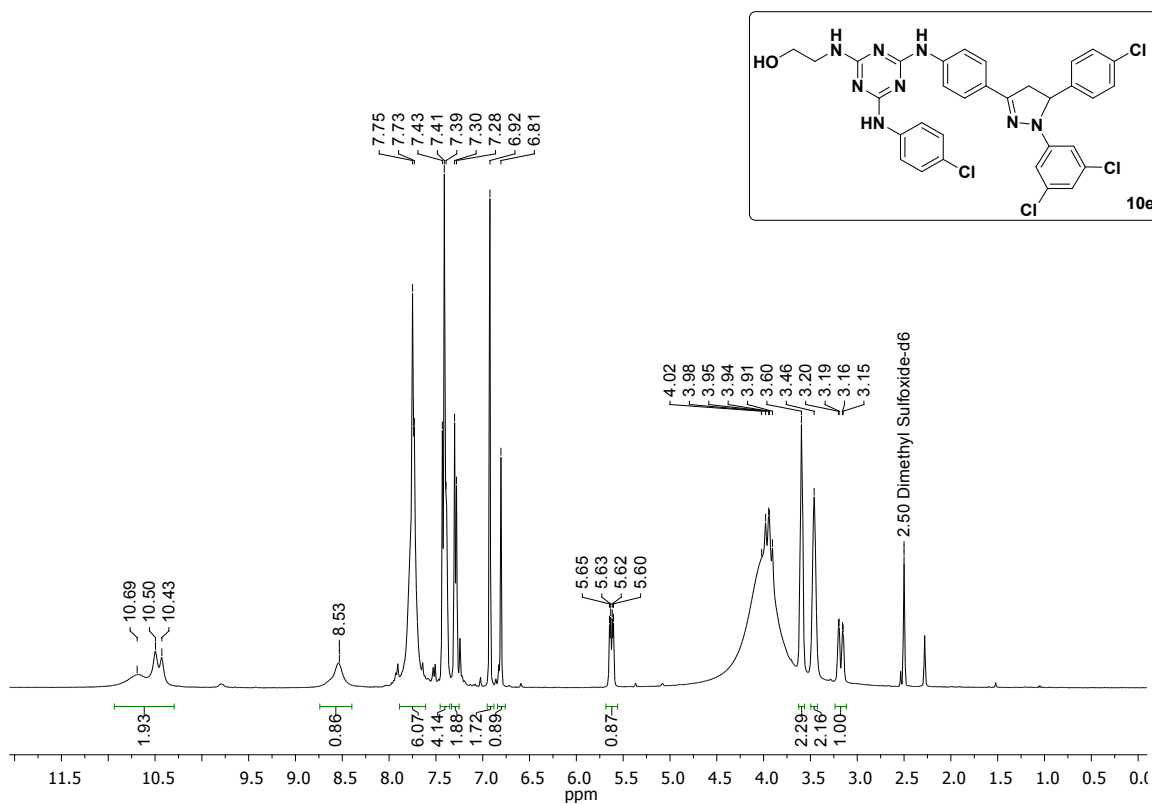

**<sup>1</sup>H NMR (400 MHz, DMSO-*d*<sub>6</sub>) spectrum of **10e**.**

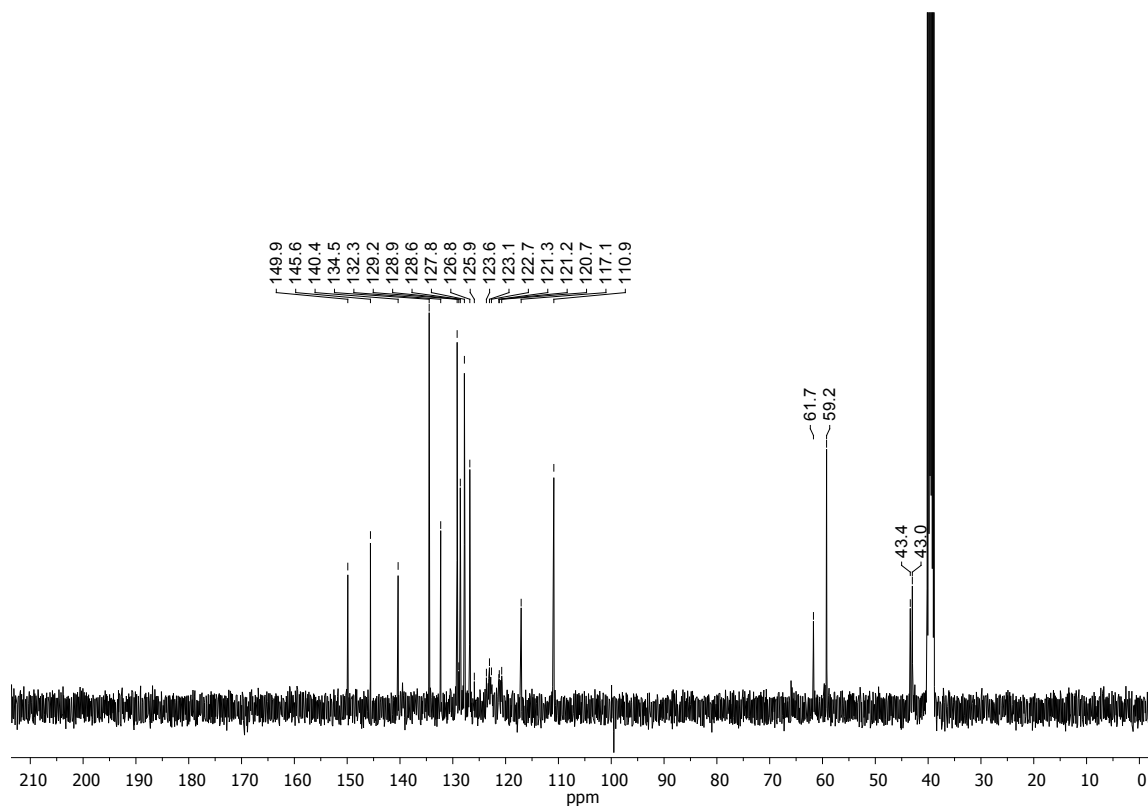

**<sup>13</sup>C NMR (100 MHz, DMSO-*d*<sub>6</sub>) spectrum of **10e**.**

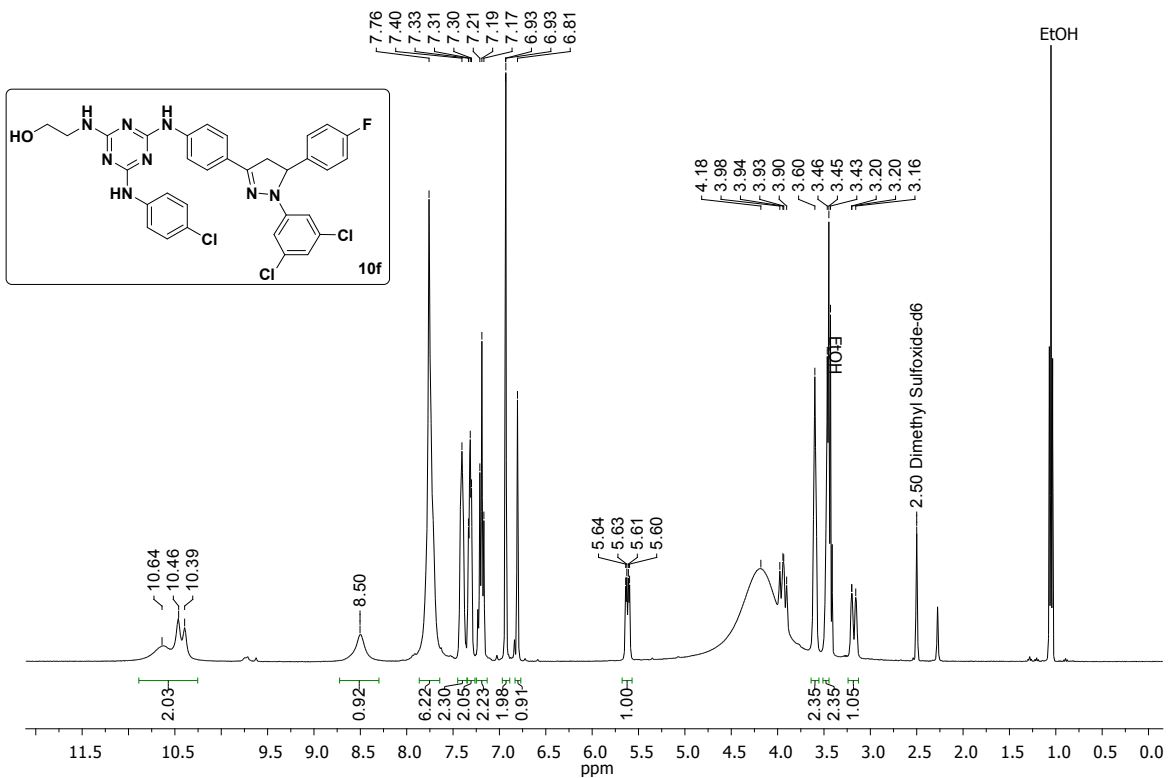

<sup>1</sup>H NMR (400 MHz, DMSO-*d*<sub>6</sub>) spectrum of **10f**.

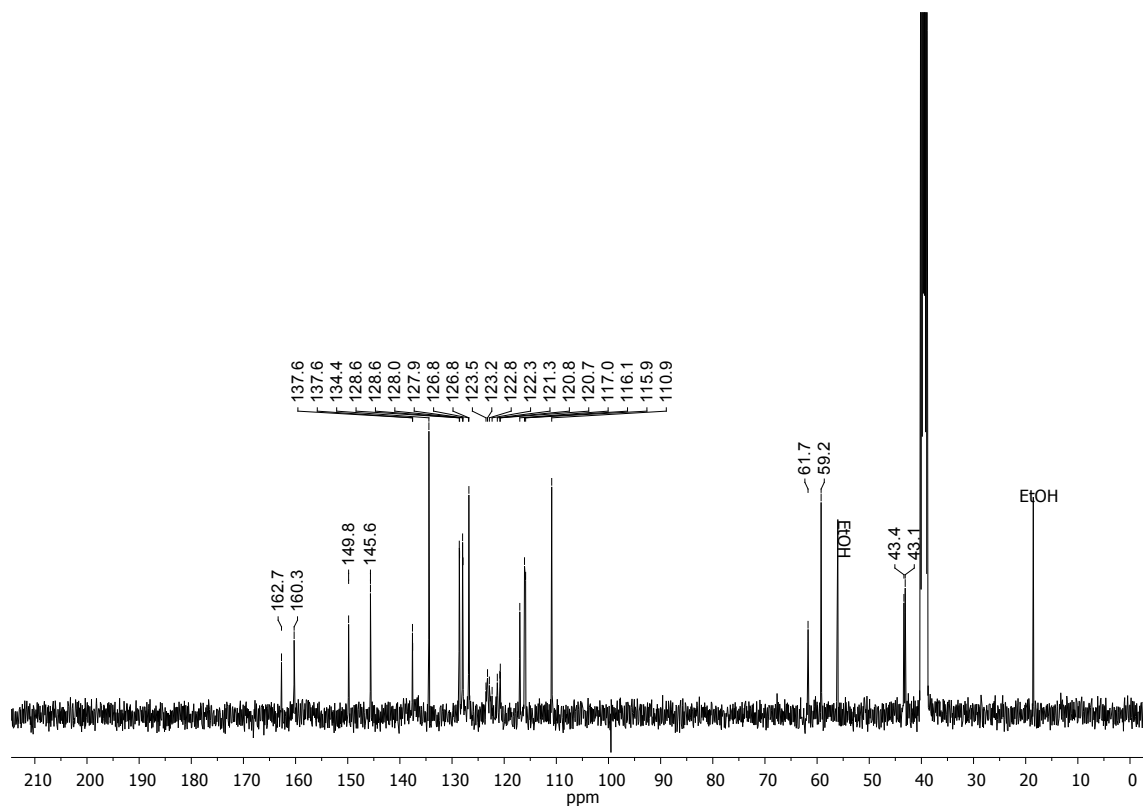

<sup>13</sup>C NMR (100 MHz, DMSO-*d*<sub>6</sub>) spectrum of **10f**.



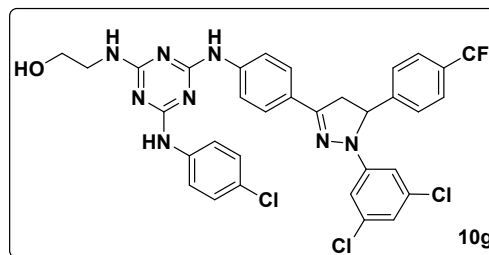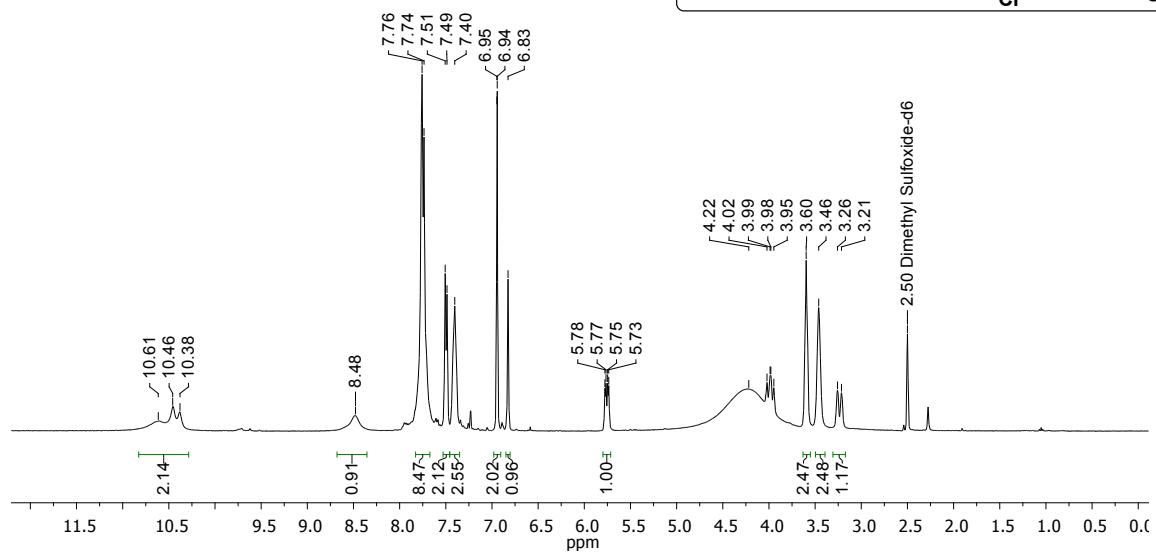

<sup>1</sup>H NMR (400 MHz, DMSO-*d*<sub>6</sub>) spectrum of **10g**.

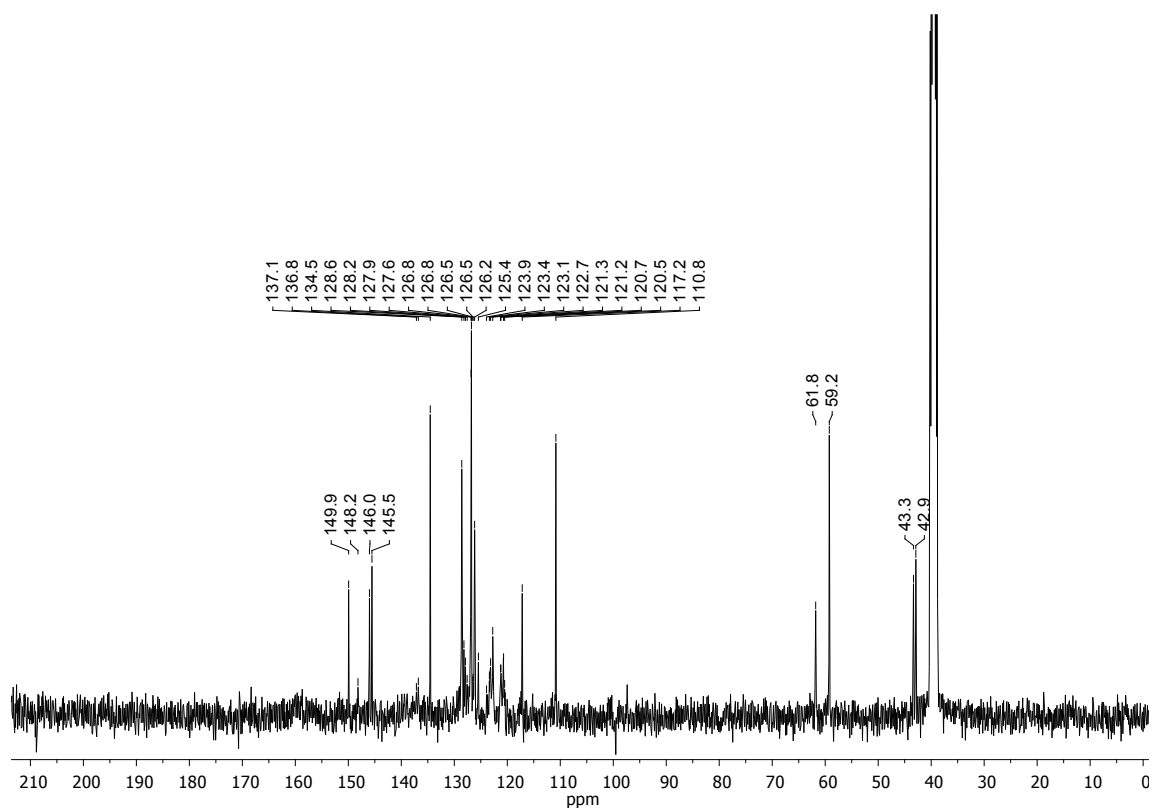

<sup>13</sup>C NMR (100 MHz, DMSO-*d*<sub>6</sub>) spectrum of **10g**.
